# Supplementary material
Source: publisher figshare collection journal article supplement (https://gsajournals.figshare.com/ndownloader/files/13750622)
Supplement: Supplementary file 1 [file 13750622]

Part A, interleaved

1 100

Raphanus LRh (1) CTAGGAACAGCTTCTACGACGATAGATAGGGGTCAGCTTTCTTTGGCATCTATGCCCCCTGCCC-TCCAAACAGTATGGGAGCCTTTCAGCTCGTACTGC

Sinapis LRh (1) CTAGGAACAGCTTCTACGACGATAGATAGGGGTCAGCTTTCTTTGGCATCTATGCCCCCTGCCC-TCCAAACAGTATGGGAGCCTTTCAGCTCGTACTGC

B. nigra LRh (1) CTAGGAACAGCTTCTACGACGATAGATAGGGGTCAGCTTTCTTTGGCATCTATGCCCCCTGCCC-TCCAAACAGTATGGGAGCCTTTCAGCTCGTACTGC

B. carinata LRh (1) CTAGGAACAGCTTCTACGACGATAGATAGGGGTCAGCTTTCTTTGGCATCTATGCCCCCTGCCC-TCCAAACAGTATGGGAGCCTTTCAGCTCGTACTGC

B. rapa LR1-1 (1) CTAGGAACAGCTTCTACGACGATAGATAGGGGTCAGCTTTCTTTGGCATCTATGCCCCCTGCCC-TCCAAACAGTATGGGAGCCTTTCAGCTCGTACTGC

B. rapa LR1-2 (1) CTAGGAACAGCTTCTACGACGATAGATAGGGGTCAGCTTTCTTTGGCATCTATGCCCCCTGCCC-TCCAAACAGTATGGGAGCCTTTCAGCTCGTACTGC

B. juncea LR1-1 (1) CTAGGAACAGCTTCTACGACGATAGATAGGGGTCAGCTTTCTTTGGCATCTATGCCCCCTGCCCCTCCAAACAGTATGGGAGCCTTTCAGCTCGTACTGC

B. juncea LR1-2 (1) CTAGGAACAGCTTCTACGACGATAGATAGGGGTCAGCTTTCTTTGGCATCTATGCCCCCTGCCC-TCCAAACAGTATGGGAGCCTTTCAGCTCGTACTGC

B napus pol LR1-1 (1) CTAGGAACAGCTTCTACGACGATAGATAGGGGTCAGCTTTCTTTGGCATCTATGCCCCCTGCCC-TCCAAACAGTATGGGAGCCTTTCAGCTCGTACTGC

B napus pol LR1-2 (1) CTAGGAACAGCTTCTACGACGATAGATAGGGGTCAGCTTTCTTTGGCATCTATGCCCCCTGCCC-TCCAAACAGTATGGGAGCCTTTCAGCTCGTACTGC

B. oleracea f LR1-1 (1) CTAGGAACAGCTTCTACGACGATAGATAGGGGTCAGCTTTCTTTGGCATCTATGCCCCCTGCCC-TCCAAACAGTATGGGAGCCTTTCAGCTCGTACTGC

B. oleracea f LR1-2 (1) CTAGGAACAGCTTCTACGACGATAGATAGGGGTCAGCTTTCTTTGGCATCTATGCCCCCTGCCC-TCCAAACAGTATGGGAGCCTTTCAGCTCGTACTGC

101 200

Raphanus LRh (100) TCACACTCCTAGATCTTCACGGCACCTCCTCCACCATAGTGTGAGCTGCTCCCAGCGGAGAAAAGCAAGGCCTACTTCGAAATTAGCTTTCAACAACGTC

Sinapis LRh (100) TCACACTCCTAGATCTTCACGGCACCTCCTCCACCATAGTGTGAGCTGCTCCCAGCGGAGAAAAGCAAGGCCTACTTCGAAATTAGCTTTCAACAACGTC

B. nigra LRh (100) TCACACTCCTAGATCTTCACGGCACCTCCTCCACCATAGTGTGAGCTGCTCCCAGCGGAGAAAAGCAAGGCCTACTTCGAAATTAGCTTTCAACAACGTC

B. carinata LRh (100) TCACACTCCTAGATCTTCACGGCACCTCCTCCACCATAGTGTGAGCTGCTCCCAGCGGAGAAAAGCAAGGCCTACTTCGAAATTAGCTTTCAACAACGTC

B. rapa LR1-1 (100) TCACACTCCTAGATCTTCACGGCACCTCCTCCACCATAGTGTGAGCTGCTCCCAGCGGAGAAAAGCAAGGCCTACTTCGAAATTAGCTTTCAACAACGTC

B. rapa LR1-2 (100) TCACACTCCTAGATCTTCACGGCACCTCCTCCACCATAGTGTGAGCTGCTCCCAGCGGAGAAAAGCAAGGCCTACTTCGAAATTAGCTTTCAACAACGTC

B. juncea LR1-1 (101) TCACACTCCTAGATCTTCACGGCACCTCCTCCACCATAGTGTGAGCTGCTCCCAGCGGAGAAAAGCAAGGCCTACTTCGAAATTAGCTTTCAACAACGTC

B. juncea LR1-2 (100) TCACACTCCTAGATCTTCACGGCACCTCCTCCACCATAGTGTGAGCTGCTCCCAGCGGAGAAAAGCAAGGCCTACTTCGAAATTAGCTTTCAACAACGTC

B napus pol LR1-1 (100) TCACACTCCTAGATCTTCACGGCACCTCCTCCACCATAGTGTGAGCTGCTCCCAGCGGAGAAAAGCAAGGCCTACTTCGAAATTAGCTTTCAACAACGTC

B napus pol LR1-2 (100) TCACACTCCTAGATCTTCACGGCACCTCCTCCACCATAGTGTGAGCTGCTCCCAGCGGAGAAAAGCAAGGCCTACTTCGAAATTAGCTTTCAACAACGTC

B. oleracea f LR1-1 (100) TCACACTCCTAGATCTTCACGGCACCTCCTCCACCATAGTGTGAGCTGCTCCCAGCGGAGAAAAGCAAGGCCTACTTCGAAATTAGCTTTCAACAACGTC

B. oleracea f LR1-2 (100) TCACACTCCTAGATCTTCACGGCACCTCCTCCACCATAGTGTGAGCTGCTCCCAGCGGAGAAAAGCAAGGCCTACTTCGAAATTAGCTTTCAACAACGTC

201 300

Raphanus LRh (200) AACAACACCACGAAAAAAGTCAACAATGGTTGCCCACTAATCTGATCATAGGTGAAATCCAATCCCTTCGCTTCGCGCCAGGCTTTGAAACCGTAAGTCA

Sinapis LRh (200) AACAACACCACGAAAAAAGTCAACAATGGTTGCCCACTAATCTGATCATAGGTGAAATCCAATCCCTTCGCTTCGCGCCAGGCTTTGAAACCGTAAGTCA

B. nigra LRh (200) AACAACACCACGAAAAAAGTCAACAATGGTTGCCCACTAATCTGATCATAGGTGAAATCCAATCCCTTCGCTTCGCGCCAGGCTTTGAAACCGTAAGTCA

B. carinata LRh (200) AACAACACCACGAAAAAAGTCAACAATGGTTGCCCACTAATCTGATCATAGGTGAAATCCAATCCCTTCGCTTCGCGCCAGGCTTTGAAACCGTAAGTCA

B. rapa LR1-1 (200) AACAACACCACGAAAAAAGTCAACAATGGTTGCCCACTAATCTGATCATAGGTGAAATCCAATCCCTTCGCTTCGCGCCAGGCTTTGAAACCGTAAGTCA

B. rapa LR1-2 (200) AACAACACCACGAAAAAAGTCAACAATGGTTGCCCACTAATCTGATCATAGGTGAAATCCAATCCCTTCGCTTCGCGCCAGGCTTTGAAACCGTAAGTCA

B. juncea LR1-1 (201) AACAACACCACGAAAAAAGTCAACAATGGTTGCCCACTAATCTGATCATAGGTGAAATCCAATCCCTTCGCTTCGCGCCAGGCTTTGAAACCGTAAGTCA

B. juncea LR1-2 (200) AACAACACCACGAAAAAAGTCAACAATGGTTGCCCACTAATCTGATCATAGGTGAAATCCAATCCCTTCGCTTCGCGCCAGGCTTTGAAACCGTAAGTCA

B napus pol LR1-1 (200) AACAACACCACGAAAAAAGTCAACAATGGTTGCCCACTAATCTGATCATAGGTGAAATCCAATCCCTTCGCTTCGCGCCAGGCTTTGAAACCGTAAGTCA

B napus pol LR1-2 (200) AACAACACCACGAAAAAAGTCAACAATGGTTGCCCACTAATCTGATCATAGGTGAAATCCAATCCCTTCGCTTCGCGCCAGGCTTTGAAACCGTAAGTCA

B. oleracea f LR1-1 (200) AACAACACCACGAAAAAAGTCAACAATGGTTGCCCACTAATCTGATCATAGGTGAAATCCAATCCCTTCGCTTCGCGCCAGGCTTTGAAACCGTAAGTCA

B. oleracea f LR1-2 (200) AACAACACCACGAAAAAAGTCAACAATGGTTGCCCACTAATCTGATCATAGGTGAAATCCAATCCCTTCGCTTCGCGCCAGGCTTTGAAACCGTAAGTCA

301 400

Raphanus LRh (300) GGCGCCTTCGGCCCTCTCCTTTCAGTCGAGTTGCTAAAGCACCTCTCGGAAGCGAGAAAGCGAGCAGCAAGCTGAAAAAAGGGAAAAGTGGTTTTATAAA

Sinapis LRh (300) GGCGCCTTCGGCCCTCTCCTTTCAGTCGAGTTGCTAAAGCACCTCTCGGAAGCGAGAAAGCGAGCAGCAAGCTGAAAAAAGGGAAAAGTGGTTTTATAAA

B. nigra LRh (300) GGCGCCTTCGGCCCTCTCCTTTCAGTCGAGTTGCTAAAGCACCTCTCGGAAGCGAGAAAGCGAGCAGCAAGCTGAAAAAAGGGAAAAGTGGTTTTATAAA

B. carinata LRh (300) GGCGCCTTCGGCCCTCTCCTTTCAGTCGAGTTGCTAAAGCACCTCTCGGAAGCGAGAAAGCGAGCAGCAAGCTGAAAAAAGGGAAAAGTGGTTTTATAAA

B. rapa LR1-1 (300) GGCGCCTTCGGCCCTCTCCTTTCAGTCGAGTTGCTAAAGCACCTCTCGGAAGCGAGAAAGCGAGCAGCAAGCTGAAAAAAGGGAAAAGTGGTTTTATAAA

B. rapa LR1-2 (300) GGCGCCTTCGGCCCTCTCCTTTCAGTCGAGTTGCTAAAGCACCTCTCGGAAGCGAGAAAGCGAGCAGCAAGCTGAAAAAAGGGAAAAGTGGTTTTATAAA

B. juncea LR1-1 (301) GGCGCCTTCGGCCCTCTCCTTTCAGTCGAGTTGCTAAAGCACCTCTCGGAAGCGAGAAAGCGAGCAGCAAGCTGAAAAAAGGGAAAAGTGGTTTTATAAA

B. juncea LR1-2 (300) GGCGCCTTCGGCCCTCTCCTTTCAGTCGAGTTGCTAAAGCACCTCTCGGAAGCGAGAAAGCGAGCAGCAAGCTGAAAAAAGGGAAAAGTGGTTTTATAAA

B napus pol LR1-1 (300) GGCGCCTTCGGCCCTCTCCTTTCAGTCGAGTTGCTAAAGCACCTCTCGGAAGCGAGAAAGCGAGCAGCAAGCTGAAAAAAGGGAAAAGTGGTTTTATAAA

B napus pol LR1-2 (300) GGCGCCTTCGGCCCTCTCCTTTCAGTCGAGTTGCTAAAGCACCTCTCGGAAGCGAGAAAGCGAGCAGCAAGCTGAAAAAAGGGAAAAGTGGTTTTATAAA

B. oleracea f LR1-1 (300) GGCGCCTTCGGCCCTCTCCTTTCAGTCGAGTTGCTAAAGCACCTCTCGGAAGCGAGAAAGCGAGCAGCAAGCTGAAAAAAGGGAAAAGTGGTTTTATAAA

B. oleracea f LR1-2 (300) GGCGCCTTCGGCCCTCTCCTTTCAGTCGAGTTGCTAAAGCACCTCTCGGAAGCGAGAAAGCGAGCAGCAAGCTGAAAAAAGGGAAAAGTGGTTTTATAAA

401 500

Raphanus LRh (400) GCAAAATAAGCTAAGGGGGCTGGCTAGGAATCGCAAGAATTGAGAAGGGTGGGAAAGACAGGTTCGGAAATAGCCGGATTAGCAGGAGGAAGGTCTTGAA

Sinapis LRh (400) GCAAAATAAGCTAAGGGGGCTGGCTAGGAATCGCAAGAATTGAGAAGGGTGGGAAAGACAGGTTCGGAAATGGCCGGATTAGCAGGAGGAAGGTCTTGAA

B. nigra LRh (400) GCAAAATAAGCTAAGGGGGCTGGCTAGGAATCGCAAGAATTGAGAAGGGTGGGAAAGACAGGTTCGGAAATGGCCGGATTAGCAGGAGGAAGGTCTTGAA

B. carinata LRh (400) GCAAAATAAGCTAAGGGGGCTGGCTAGGAATCGCAAGAATTGAGAAGGGTGGGAAAGACAGGTTCGGAAATGGCCGGATTAGCAGGAGGAAGGTCTTGAA

B. rapa LR1-1 (400) GCAAAATAAGCTAAGGGGGCTGGCTAGGAATCGCAAGAATTGAGAAGGGTGGGAAAGACAGGTTCGGAAATGGCCGGATTAGCAGGAGGAAGGTCTTGAA

B. rapa LR1-2 (400) GCAAAATAAGCTAAGGGGGCTGGCTAGGAATCGCAAGAATTGAGAAGGGTGGGAAAGACAGGTTCGGAAATGGCCGGATTAGCAGGAGGAAGGTCTTGAA

B. juncea LR1-1 (401) GCAAAATAAGCTAAGGGGGCTGGCTAGGAATCGCAAGAATTGAGAAGGGTGGGAAAGACAGGTTCGGAAATGGCCGGATTAGCAGGAGGAAGGTCTTGAA

B. juncea LR1-2 (400) GCAAAATAAGCTAAGGGGGCTGGCTAGGAATCGCAAGAATTGAGAAGGGTGGGAAAGACAGGTTCGGAAATGGCCGGATTAGCAGGAGGAAGGTCTTGAA

B napus pol LR1-1 (400) GCAAAATAAGCTAAGGGGGCTGGCTAGGAATCGCAAGAATTGAGAAGGGTGGGAAAGACAGGTTCGGAAATGGCCGGATTAGCAGGAGGAAGGTCTTGAA

B napus pol LR1-2 (400) GCAAAATAAGCTAAGGGGGCTGGCTAGGAATCGCAAGAATTGAGAAGGGTGGGAAAGACAGGTTCGGAAATGGCCGGATTAGCAGGAGGAAGGTCTTGAA

B. oleracea f LR1-1 (400) GCAAAATAAGCTAAGGGGGCTGGCTAGGAATCGCAAGAATTGAGAAGGGTGGGAAAGACAGGTTCGGAAATGGCCGGATTAGCAGGAGGAAGGTCTTGAA

B. oleracea f LR1-2 (400) GCAAAATAAGCTAAGGGGGCTGGCTAGGAATCGCAAGAATTGAGAAGGGTGGGAAAGACAGGTTCGGAAATGGCCGGATTAGCAGGAGGAAGGTCTTGAA

501 600

Raphanus LRh (500) GAGCCTGAAACAAAGAAAGGTGTACATAAAAAAAGAGGCTGGTTATGGCCTTTACTTGATAGGACTCCTTTCCCATCTATCTTGACCGGGAAGAGGGGAT

Sinapis LRh (500) GAGCCTGAAACAAAGAAAGGTGTACATAAAAAAAGAGGCTGGTTATGGCCTTTACTTGATAGGACTCCTTTCCCATCTATCTTGACCGGGAAGAGGGGAT

B. nigra LRh (500) GAGCCTGAAACAAAGAAAGGTGTACATAAAAAAAGAGGCTGGTTATGGCCTTTACTTGATAGGACTCCTTTCCCATCTATCTTGACCGGGAAGAGGGGAT

B. carinata LRh (500) GAGCCTGAAACAAAGAAAGGTGTACATAAAAAAAGAGGCTGGTTATGGCCTTTACTTGATAGGACTCCTTTCCCATCTATCTTGACCGGGAAGAGGGGAT

B. rapa LR1-1 (500) GAGCCTGAAACAAAGAAAGGTGTACATAAAAAA-GAGGCTGGTTATGGCCTTTACTTGATAGGACTCCTTTCCCATCTATCTTGACCGGGAAGAGGGGAT

B. rapa LR1-2 (500) GAGCCTGAAACAAAGAAAGGTGTACATAAAAAAAGAGGCTGGTTATGGCCTTTACTTGATAGGACTCCTTTCCCATCTATCTTGACCGGGAAGAGGGGAT

B. juncea LR1-1 (501) GAGCCTGAAACAAAGAAAGGTGTACATAAAAAAAGAGGCTGGTTATGGCCTTTACTTGATAGGACTCCTTTCCCATCTATCTTGACCGGGAAGAGGGGAT

B. juncea LR1-2 (500) GAGCCTGAAACAAAGAAAGGTGTACATAAAAAAAGAGGCTGGTTATGGCCTTTACTTGATAGGACTCCTTTCCCATCTATCTTGACCGGGAAGAGGGGAT

B napus pol LR1-1 (500) GAGCCTGAAACAAAGAAAGGTGTACATAAAAAAAGAGGCTGGTTATGGCCTTTACTTGATAGGACTCCTTTCCCATCTATCTTGACCGGGAAGAGGGGAT

B napus pol LR1-2 (500) GAGCCTGAAACAAAGAAAGGTGTACATAAAAAAAGAGGCTGGTTATGGCCTTTACTTGATAGGACTCCTTTCCCATCTATCTTGACCGGGAAGAGGGGAT

B. oleracea f LR1-1 (500) GAGCCTGAAACAAAGAAAGGTGTACATAAAAAAAGAGGCTGGTTATGGCCTTTACTTGATAGGACTCCTTTCCCATCTATCTTGACCGGGAAGAGGGGAT

B. oleracea f LR1-2 (500) GAGCCTGAAACAAAGAAAGGTGTACATAAAAAAAGAGGCTGGTTATGGCCTTTACTTGATAGGACTCCTTTCCCATCTATCTTGACCGGGAAGAGGGGAT

601 700

Raphanus LRh (600) AAAAAACCTTGCTAACGCCCTGCCCACCCTTCTGGATCCCTCATATTTATGATTCCAGGCTTCCCGGACTCGTAATAGACGGCTAAGAACAAGAAGAGGG

Sinapis LRh (600) AAAAAACCTTGCTAACGCCCTGCCCACCCTTCTGGATCCCTCATATTTATGATTCCAGGCTTCCCGGACTCGTAATAGACGGCTAAGAACAAGAAGAGGG

B. nigra LRh (600) AAAAAACCTTGCTAACGCCCTGCCCACCCTTCTGGATCCCTCATATTTATGATTCCAGGCTTCCCGGACTCGTAATAGACGGCTAAGAACAAGAAGAGGG

B. carinata LRh (600) AAAAAACCTTGCTAACGCCCTGCCCACCCTTCTGGATCCCTCATATTTATGATTCCAGGCTTCCCGGACTCGTAATAGACGGCTAAGAACAAGAAGAGGG

B. rapa LR1-1 (599) AAAAAACCTTGCTAACGCCCTGCCCACCCTTCTGGATCCCTCATATTTATGATTCCAGGCTTCCCGGACTCGTAATAGACGGCTAAGAACAAGAAGAGGG

B. rapa LR1-2 (600) AAAAAACCTTGCTAACGCCCTGCCCACCCTTCTGGATCCCTCATATTTATGATTCCAGGCTTCCCGGACTCGTAATAGACGGCTAAGAACAAGAAGAGGG

B. juncea LR1-1 (601) AAAAAACCTTGCTAACGCCCTGCCCACCCTTCTGGATCCCTCATATTTATGATTCCAGGCTTCCCGGACTCGTAATAGACGGCTAAGAACAAGAAGAGGG

B. juncea LR1-2 (600) AAAAAACCTTGCTAACGCCCTGCCCACCCTTCTGGATCCCTCATATTTATGATTCCAGGCTTCCCGGACTCGTAATAGACGGCTAAGAACAAGAAGAGGG

B napus pol LR1-1 (600) AAAAAACCTTGCTAACGCCCTGCCCACCCTTCTGGATCCCTCATATTTATGATTCCAGGCTTCCCGGACTCGTAATAGACGGCTAAGAACAAGAAGAGGG

B napus pol LR1-2 (600) AAAAAACCTTGCTAACGCCCTGCCCACCCTTCTGGATCCCTCATATTTATGATTCCAGGCTTCCCGGACTCGTAATAGACGGCTAAGAACAAGAAGAGGG

B. oleracea f LR1-1 (600) AAAAAACCTTGCTAACGCCCTGCCCACCCTTCTGGATCCCTCATATTTATGATTCCAGGCTTCCCGGACTCGTAATAGACGGCTAAGAACAAGAAGAGGG

B. oleracea f LR1-2 (600) AAAAAACCTTGCTAACGCCCTGCCCACCCTTCTGGATCCCTCATATTTATGATTCCAGGCTTCCCGGACTCGTAATAGACGGCTAAGAACAAGAAGAGGG

701 800

Raphanus LRh (700) TCAGTAGTCTCTGCCGTTGCAGGTCCTTCTCCTTCCGCTGAGACGGCCCTCTTTTTTTGTTTGTTCACCGCGGCACGAAATCATGAAGAAGCTGGAATAA

Sinapis LRh (700) TCAGTAGTCTCTGCCGTTGCAGGTCCTTCTCCTTCCGCTGAGACGGCCCTCTTTTTTTGTTTGTTCACCGCGGCACGAAATCATGAAGAAGCTGGAATAA

B. nigra LRh (700) TCAGTAGTCTCTGCCGTTGCAGGTCCTTCTCCTTCCGCTGAGACGGCCCTCTTTTTTTGTTTGTTCACCGCGGCACGAAATCATGAAGAAGCTGGAATAA

B. carinata LRh (700) TCAGTAGTCTCTGCCGTTGCAGGTCCTTCTCCTTCCGCTGAGACGGCCCTCTTTTTTTGTTTGTTCACCGCGGCACGAAATCATGAAGAAGCTGGAATAA

B. rapa LR1-1 (699) TCAGTAGTCTCTGCCGTTGCAGGTCCTTCTCCTTCCGCTGAGACGGCCTTCTTTTTTTGTTTGTTCACCGCGGCACGAAATCATGAAGAAGCTGGAATAA

B. rapa LR1-2 (700) TCAGTAGTCTCTGCCGTTGCAGGTCCTTCTCCTTCCGCTGAGACGGCCTTCTTTTTTTGTTTGTTCACCGCGGCACGAAATCATGAAGAAGCTGGAATAA

B. juncea LR1-1 (701) TCAGTAGTCTCTGCCGTTGCAGGTCCTTCTCCTTCCGCTGAGACGGCCTTCTTTTTTTGTTTGTTCACCGCGGCACGAAATCATGAAGAAGCTGGAATAA

B. juncea LR1-2 (700) TCAGTAGTCTCTGCCGTTGCAGGTCCTTCTCCTTCCGCTGAGACGGCCTTCTTTTTTTGTTTGTTCACCGCGGCACGAAATCATGAAGAAGCTGGAATAA

B napus pol LR1-1 (700) TCAGTAGTCTCTGCCGTTGCAGGTCCTTCTCCTTCCGCTGAGACGGCCTTCTTTTTTTGTTTGTTCACCGCGGCACGAAATCATGAAGAAGCTGGAATAA

B napus pol LR1-2 (700) TCAGTAGTCTCTGCCGTTGCAGGTCCTTCTCCTTCCGCTGAGACGGCCTTCTTTTTTTGTTTGTTCACCGCGGCACGAAATCATGAAGAAGCTGGAATAA

B. oleracea f LR1-1 (700) TCAGTAGTCTCTGCCGTTGCAGGTCCTTCTCCTTCCGCTGAGACGGCCTTCTTTTTTTGTTTGTTCACCGCGGCACGAAATCATGAAGAAGCTGGAATAA

B. oleracea f LR1-2 (700) TCAGTAGTCTCTGCCGTTGCAGGTCCTTCTCCTTCCGCTGAGACGGCCTTCTTTTTTTGTTTGTTCACCGCGGCACGAAATCATGAAGAAGCTGGAATAA

801 900

Raphanus LRh (800) CTCAGAAAGAGAGTGGCGCCTAGCCGTTGAGAGCGTCTATTATCTTTGTAGAGGAACAGTACGATCTTGGACTGGCCCCCTTCGCATGACCTAGAAAGAT

Sinapis LRh (800) CTCAGAAAGAGAGTGGCGCCTAGCCGTTGAGAGCGTCTATTATCTTTGTAGAGGAACAGTACGATCTTGGACTGGCCCCCTTCGCATGACCTAGAAAGAT

B. nigra LRh (800) CTCAGAAAGAGAGTGGCGCCTAGCCGTTGAGAGCGTCTATTATCTTTGTAGAGGAACAGTACGATCTTGGACTGGCCCCCTTCGCATGACCTAGAAAGAT

B. carinata LRh (800) CTCAGAAAGAGAGTGGCGCCTAGCCGTTGAGAGCGTCTATTATCTTTGTAGAGGAACAGTACGATCTTGGACTGGCCCCCTTCGCATGACCTAGAAAGAT

B. rapa LR1-1 (799) CTCAGAAAGAGAGTGGCGCCTAGCCGTTGAGAGCGTCTATTATCTTTGTAGAGGAACAGTACGATCTTGGACTGGCCCCCTTCGCATGACCTAGAAAGAT

B. rapa LR1-2 (800) CTCAGAAAGAGAGTGGCGCCTAGCCGTTGAGAGCGTCTATTATCTTTGTAGAGGAACAGTACGATCTTGGACTGGCCCCCTTCGCATGACCTAGAAAGAT

B. juncea LR1-1 (801) CTCAGAAAGAGAGTGGCGCCTAGCCGTTGAGAGCGTCTATTATCTTTGTAGAGGAACAGTACGATCTTGGACTGGCCCCCTTCGCATGACCTAGAAAGAT

B. juncea LR1-2 (800) CTCAGAAAGAGAGTGGCGCCTAGCCGTTGAGAGCGTCTATTATCTTTGTAGAGGAACAGTACGATCTTGGACTGGCCCCCTTCGCATGACCTAGAAAGAT

B napus pol LR1-1 (800) CTCAGAAAGAGAGTGGCGCCTAGCCGTTGAGAGCGTCTATTATCTTTGTAGAGGAACAGTACGATCTTGGACTGGCCCCCTTCGCATGACCTAGAAAGAT

B napus pol LR1-2 (800) CTCAGAAAGAGAGTGGCGCCTAGCCGTTGAGAGCGTCTATTATCTTTGTAGAGGAACAGTACGATCTTGGACTGGCCCCCTTCGCATGACCTAGAAAGAT

B. oleracea f LR1-1 (800) CTCAGAAAGAGAGTGGCGCCTAGCCGTTGAGAGCGTCTATTATCTTTGTAGAGGAACAGTACGATCTTGGACTGGCCCCCTTCGCATGACCTAGAAAGAT

B. oleracea f LR1-2 (800) CTCAGAAAGAGAGTGGCGCCTAGCCGTTGAGAGCGTCTATTATCTTTGTAGAGGAACAGTACGATCTTGGACTGGCCCCCTTCGCATGACCTAGAAAGAT

901 1000

Raphanus LRh (900) AAAGAAGTCCATGCTACTATAAGGCCTCTAAACTCCTCCCTCAGGACACTATTGCGTTGCCCATGGGGACGGGGTAGCCCCGACTTCCATAGGTCCTTGG

Sinapis LRh (900) AAAGAAGTCCATGCTACTATAAGGCCTCTAAACTCCTCCCTCAGGACACTATTGCGTTGCCCATGGGGACGGGGTAGCCCCGACTTCCATAGGTCCTTGG

B. nigra LRh (900) AAAGAAGTCCATGCTACTATAAGGCCTCTAAACTCCTCCCTCAGGACACTATTGCGTTGCCCATGGGGACGGGGTAGCCCCGACTTCCATAGGTCCTTGG

B. carinata LRh (900) AAAGAAGTCCATGCTACTATAAGGCCTCTAAACTCCTCCCTCAGGACACTATTGCGTTGCCCATGGGGACGGGGTAGCCCCGACTTCCATAGGTCCTTGG

B. rapa LR1-1 (899) AAAGAAGTCCATGCTACTATAAGGCCTCTAAACTCCTCCCTCAGGACACTATTGCGTTGCCCATGGGGACGGGGTAGCCCCGACTTCCATAGGTCCTTGG

B. rapa LR1-2 (900) AAAGAAGTCCATGCTACTATAAGGCCTCTAAACTCCTCCCTCAGGACACTATTGCGTTGCCCATGGGGACGGGGTAGCCCCGACTTCCATAGGTCCTTGG

B. juncea LR1-1 (901) AAAGAAGTCCATGCTACTATAAGGCCTCTAAACTCCTCCCTCAGGACACTATTGCGTTGCCCATGGGGACGGGGTAGCCCCGACTTCCATAGGTCCTTGG

B. juncea LR1-2 (900) AAAGAAGTCCATGCTACTATAAGGCCTCTAAACTCCTCCCTCAGGACACTATTGCGTTGCCCATGGGGACGGGGTAGCCCCGACTTCCATAGGTCCTTGG

B napus pol LR1-1 (900) AAAGAAGTCCATGCTACTATAAGGCCTCTAAACTCCTCCCTCAGGACACTATTGCGTTGCCCATGGGGACGGGGTAGCCCCGACTTCCATAGGTCCTTGG

B napus pol LR1-2 (900) AAAGAAGTCCATGCTACTATAAGGCCTCTAAACTCCTCCCTCAGGACACTATTGCGTTGCCCATGGGGACGGGGTAGCCCCGACTTCCATAGGTCCTTGG

B. oleracea f LR1-1 (900) AAAGAAGTCCATGCTACTATAAGGCCTCTAAACTCCTCCCTCAGGACACTATTGCGTTGCCCATGGGGACGGGGTAGCCCCGACTTCCATAGGTCCTTGG

B. oleracea f LR1-2 (900) AAAGAAGTCCATGCTACTATAAGGCCTCTAAACTCCTCCCTCAGGACACTATTGCGTTGCCCATGGGGACGGGGTAGCCCCGACTTCCATAGGTCCTTGG

1001 1100

Raphanus LRh (1000) TTCGACCTCCTAATGAGAATTGAGGTCCTTGCGCGGGCGTCTCATCCCTAAGACTTGCTTGCTCTGTATGGAGTGCCCTGTGGTTCCTCGAGTGCCAGCC

Sinapis LRh (1000) TTCGACCTCCTAATGAGAATTGAGGTCCTTGCGCGGGCGTCTCATCCCTAAGACTTGCTTGCTCTGTATGGAGTGCCCTGTGGTTCCTCGAGTGCCAGCC

B. nigra LRh (1000) TTCGACCTCCTAATGAGAATTGAGGTCCTTGCGCGGGCGTCTCATCCCTAAGACTTGCTTGCTCTGTATGGAGTGCCCTGTGGTTCCTCGAGTGCCAGCC

B. carinata LRh (1000) TTCGACCTCCTAATGAGAATTGAGGTCCTTGCGCGGGCGTCTCATCCCTAAGACTTGCTTGCTCTGTATGGAGTGCCCTGTGGTTCCTCGAGTGCCAGCC

B. rapa LR1-1 (999) TTCGACCTCCTAATGAGAATTGAGGTCCTTGCGCGGGCGTCTCATCCCTAAGACTTGCTTGCTCTGTATGGAGTGCCCTGTGGTTCCTCGAGTGCCAGCC

B. rapa LR1-2 (1000) TTCGACCTCCTAATGAGAATTGAGGTCCTTGCGCGGGCGTCTCATCCCTAAGACTTGCTTGCTCTGTATGGAGTGCCCTGTGGTTCCTCGAGTGCCAGCC

B. juncea LR1-1 (1001) TTCGACCTCCTAATGAGAATTGAGGTCCTTGCGCGGGCGTCTCATCCCTAAGACTTGCTTGCTCTGTATGGAGTGCCCTGTGGTTCCTCGAGTGCCAGCC

B. juncea LR1-2 (1000) TTCGACCTCCTAATGAGAATTGAGGTCCTTGCGCGGGCGTCTCATCCCTAAGACTTGCTTGCTCTGTATGGAGTGCCCTGTGGTTCCTCGAGTGCCAGCC

B napus pol LR1-1 (1000) TTCGACCTCCTAATGAGAATTGAGGTCCTTGCGCGGGCGTCTCATCCCTAAGACTTGCTTGCTCTGTATGGAGTGCCCTGTGGTTCCTCGAGTGCCAGCC

B napus pol LR1-2 (1000) TTCGACCTCCTAATGAGAATTGAGGTCCTTGCGCGGGCGTCTCATCCCTAAGACTTGCTTGCTCTGTATGGAGTGCCCTGTGGTTCCTCGAGTGCCAGCC

B. oleracea f LR1-1 (1000) TTCGACCTCCTAATGAGAATTGAGGTCCTTGCGCGGGCGTCTCATCCCTAAGACTTGCTTGCTCTGTATGGAGTGCCCTGTGGTTCCTCGAGTGCCAGCC

B. oleracea f LR1-2 (1000) TTCGACCTCCTAATGAGAATTGAGGTCCTTGCGCGGGCGTCTCATCCCTAAGACTTGCTTGCTCTGTATGGAGTGCCCTGTGGTTCCTCGAGTGCCAGCC

1101 1200

Raphanus LRh (1100) GCAGAAAGGAATGCCATCAACTAGGGCGCTATTGGCCACTAACCACTCGCTCGCCAGCCGCTCGGGCTCCGCGTTTCAAGTTCGTTATCCTAACCGTCCC

Sinapis LRh (1100) GCAGAGAGGAATGCCATCAACTAGGGCGCTATTGGCCACTAACCACTCGCTCGCCAGCCGCTCGGGCTCCGCGTTTCAAGTTCGTTATCCTAACCGTCCC

B. nigra LRh (1100) GCAGAGAGGAATGCCATCAACTAGGGCGCTATTGGCCACTAACCACTCGCTCGCCAGCCGCTCGGGCTCCGCGTTTCAAGTTCGTTATCCTAACCGTCCC

B. carinata LRh (1100) GCAGAGAGGAATGCCATCAACTAGGGCGCTATTGGCCACTAACCACTCGCTCGCCAGCCGCTCGGGCTCCGCGTTTCAAGTTCGTTATCCTAACCGTCCC

B. rapa LR1-1 (1099) GCAGAGAGGAATGCCATCAACTAGGGCGCTATTGGCCACTAACCACTCGCTCGCCAGCCGCTCGGGCTCCGCGTTTCAAGTTCGTTATCCTAACCGTCCC

B. rapa LR1-2 (1100) GCAGAGAGGAATGCCATCAACTAGGGCGCTATTGGCCACTAACCACTCGCTCGCCAGCCGCTCGGGCTCCGCGTTTCAAGTTCGTTATCCTAACCGTCCC

B. juncea LR1-1 (1101) GCAGAGAGGAATGCCATCAACTAGGGCGCTATTGGCCACTAACCACTCGCTCGCCAGCCGCTCGGGCTCCGCGTTTCAAGTTCGTTATCCTAACCGTCCC

B. juncea LR1-2 (1100) GCAGAGAGGAATGCCATCAACTAGGGCGCTATTGGCCACTAACCACTCGCTCGCCAGCCGCTCGGGCTCCGCGTTTCAAGTTCGTTATCCTAACCGTCCC

B napus pol LR1-1 (1100) GCAGAGAGGAATGCCATCAACTAGGGCGCTATTGGCCACTAACCACTCGCTCGCCAGCCGCTCGGGCTCCGCGTTTCAAGTTCGTTATCCTAACCGTCCC

B napus pol LR1-2 (1100) GCAGAGAGGAATGCCATCAACTAGGGCGCTATTGGCCACTAACCACTCGCTCGCCAGCCGCTCGGGCTCCGCGTTTCAAGTTCGTTATCCTAACCGTCCC

B. oleracea f LR1-1 (1100) GCAGAGAGGAATGCCATCAACTAGGGCGCTATTGGCCACTAACCACTCGCTCGCCAGCCGCTCGGGCTCCGCGTTTCAAGTTCGTTATCCTAACCGTCCC

B. oleracea f LR1-2 (1100) GCAGAGAGGAATGCCATCAACTAGGGCGCTATTGGCCACTAACCACTCGCTCGCCAGCCGCTCGGGCTCCGCGTTTCAAGTTCGTTATCCTAACCGTCCC

1201 1300

Raphanus LRh (1200) CTCTGCTCCACCGGGTGCCTGGCCCCTTCTTCTATCTTATCTACTGCCTTGCTCCTCGGCTCCCTACAGCTCCAGCCGCTCGCTGTAATAGCTTGCTTCT

Sinapis LRh (1200) CTCTGCTCCACCGGGTGCCTGGCCCCTTCTTCTATCTTATCTACTGCCTTGCTCCTCGGCTCCCTACAGCTCCAGCCGCTCGCTGTAATAGCTTGCTTCT

B. nigra LRh (1200) CTCTGCTCCACCGGGTGCCTGGCCCCTTCTTCTATCTTATCTACTGCCTTGCTCCTCGGCTCCCTACAGCTCCAGCCGCTCGCTGTAATAGCTTGCTTCT

B. carinata LRh (1200) CTCTGCTCCACCGGGTGCCTGGCCCCTTCTTCTATCTTATCTACTGCCTTGCTCCTCGGCTCCCTACAGCTCCAGCCGCTCGCTGTAATAGCTTGCTTCT

B. rapa LR1-1 (1199) CTCTGCTCCACCGGGTGCCTGGCCCCTTCTTCTATCTTATCTACTGCCTTGCTCCTCGGCTCCCTACAGCTCCAGCCGCTCGCTGTAATAGCTTGCTTCT

B. rapa LR1-2 (1200) CTCTGCTCCACCGGGTGCCTGGCCCCTTCTTCTATCTTATCTACTGCCTTGCTCCTCGGCTCCCTACAGCTCCAGCCGCTCGCTGTAATAGCTTGCTTCT

B. juncea LR1-1 (1201) CTCTGCTCCACCGGGTGCCTGGCCCCTTCTTCTATCTTATCTACTGCCTTGCTCCTCGGCTCCCTACAGCTCCAGCCGCTCGCTGTAATAGCTTGCTTCT

B. juncea LR1-2 (1200) CTCTGCTCCACCGGGTGCCTGGCCCCTTCTTCTATCTTATCTACTGCCTTGCTCCTCGGCTCCCTACAGCTCCAGCCGCTCGCTGTAATAGCTTGCTTCT

B napus pol LR1-1 (1200) CTCTGCTCCACCGGGTGCCTGGCCCCTTCTTCTATCTTATCTACTGCCTTGCTCCTCGGCTCCCTACAGCTCCAGCCGCTCGCTGTAATAGCTTGCTTCT

B napus pol LR1-2 (1200) CTCTGCTCCACCGGGTGCCTGGCCCCTTCTTCTATCTTATCTACTGCCTTGCTCCTCGGCTCCCTACAGCTCCAGCCGCTCGCTGTAATAGCTTGCTTCT

B. oleracea f LR1-1 (1200) CTCTGCTCCACCGGGTGCCTGGCCCCTTCTTCTATCTTATCTACTGCCTTGCTCCTCGGCTCCCTACAGCTCCAGCCGCTCGCTGTAATAGCTTGCTTCT

B. oleracea f LR1-2 (1200) CTCTGCTCCACCGGGTGCCTGGCCCCTTCTTCTATCTTATCTACTGCCTTGCTCCTCGGCTCCCTACAGCTCCAGCCGCTCGCTGTAATAGCTTGCTTCT

1301 1400

Raphanus LRh (1300) CGGGTGGCTCGCACCCCCGGGTGGTGCGGCTGAGCCAGAGTGGGCTCAACAGTCGGCCTATGTTTCCGGGCGCACGCGTAAAGGCATGATTAGTTCCACA

Sinapis LRh (1300) CGGGTGGCTCGCACCCCCGGGTGGTGCGGCTGAGCCAGAGTGGGCTCAACAGTCGGCCTATGTTTCCGGGCGCACGCGTAAAGGCATGATTAGTTCCACA

B. nigra LRh (1300) CGGGTGGCTCGCACCCCCGGGTGGTGCGGCTGAGCCAGAGTGGGCTCAACAGTCGGCCTATGTTTCCGGGCGCACGCGTAAAGGCATGATTAGTTCCACA

B. carinata LRh (1300) CGGGTGGCTCGCACCCCCGGGTGGTGCGGCTGAGCCAGAGTGGGCTCAACAGTCGGCCTATGTTTCCGGGCGCACGCGTAAAGGCATGATTAGTTCCACA

B. rapa LR1-1 (1299) CGGGTGGCTCGCACCCCCGGGTGGTGCGGCTGAGCCAGAGTGGGCTCAACAGTCGGCCTATGTTTCCGGGCGCACGCGTAAAGGCATGATTAGTTCCACA

B. rapa LR1-2 (1300) CGGGTGGCTCGCACCCCCGGGTGGTGCGGCTGAGCCAGAGTGGGCTCAACAGTCGGCCTATGTTTCCGGGCGCACGCGTAAAGGCATGATTAGTTCCACA

B. juncea LR1-1 (1301) CGGGTGGCTCGCACCCCCGGGTGGTGCGGCTGAGCCAGAGTGGGCTCAACAGTCGGCCTATGTTTCCGGGCGCACGCGTAAAGGCATGATTAGTTCCACA

B. juncea LR1-2 (1300) CGGGTGGCTCGCACCCCCGGGTGGTGCGGCTGAGCCAGAGTGGGCTCAACAGTCGGCCTATGTTTCCGGGCGCACGCGTAAAGGCATGATTAGTTCCACA

B napus pol LR1-1 (1300) CGGGTGGCTCGCACCCCCGGGTGGTGCGGCTGAGCCAGAGTGGGCTCAACAGTCGGCCTATGTTTCCGGGCGCACGCGTAAAGGCATGATTAGTTCCACA

B napus pol LR1-2 (1300) CGGGTGGCTCGCACCCCCGGGTGGTGCGGCTGAGCCAGAGTGGGCTCAACAGTCGGCCTATGTTTCCGGGCGCACGCGTAAAGGCATGATTAGTTCCACA

B. oleracea f LR1-1 (1300) CGGGTGGCTCGCACCCCCGGGTGGTGCGGCTGAGCCAGAGTGGGCTCAACAGTCGGCCTATGTTTCCGGGCGCACGCGTAAAGGCATGATTAGTTCCACA

B. oleracea f LR1-2 (1300) CGGGTGGCTCGCACCCCCGGGTGGTGCGGCTGAGCCAGAGTGGGCTCAACAGTCGGCCTATGTTTCCGGGCGCACGCGTAAAGGCATGATTAGTTCCACA

1401 1500

Raphanus LRh (1400) AATCTCACTGCACTGACCATAGTAAACTCCTTCTCGTTGTACCAAAATAGAGATTTGATTTAAACGACCAGGTACAGCATCACATTTGACACCTGAGGAA

Sinapis LRh (1400) AATCTCACTGCACTGACCATAGTAAACTCCTTCTCGTTGTACCAAAATAGAGATTTGATTTAAACGACCAGGTACAGCATCACATTTGACACCTGAGGAA

B. nigra LRh (1400) AATCTCACTGCACTGACCATAGTAAACTCCTTCTCGTTGTACCAAAATAGAGATTTGATTTAAACGACCAGGTACAGCATCACATTTGACACCTGAGGAA

B. carinata LRh (1400) AATCTCACTGCACTGACCATAGTAAACTCCTTCTCGTTGTACCAAAATAGAGATTTGATTTAAACGACCAGGTACAGCATCACATTTGACACCTGAGGAA

B. rapa LR1-1 (1399) AATCTCACTGCACTGACCATAGTAAACTCCTTCTCGTTGTACCAAAATAGAGATTTGATTTAAACGACCAGGTACAGCATCACATTTGACACCTGAGGAA

B. rapa LR1-2 (1400) AATCTCACTGCACTGACCATAGTAAACTCCTTCTCGTTGTACCAAAATAGAGATTTGATTTAAACGACCAGGTACAGCATCACATTTGACACCTGAGGAA

B. juncea LR1-1 (1401) AATCTCACTGCACTGACCATAGTAAACTCCTTCTCGTTGTACCAAAATAGAGATTTGATTTAAACGACCAGGTACAGCATCACATTTGACACCTGAGGAA

B. juncea LR1-2 (1400) AATCTCACTGCACTGACCATAGTAAACTCCTTCTCGTTGTACCAAAATAGAGATTTGATTTAAACGACCAGGTACAGCATCACATTTGACACCTGAGGAA

B napus pol LR1-1 (1400) AATCTCACTGCACTGACCATAGTAAACTCCTTCTCGTTGTACCAAAATAGAGATTTGATTTAAACGACCAGGTACAGCATCACATTTGACACCTGAGGAA

B napus pol LR1-2 (1400) AATCTCACTGCACTGACCATAGTAAACTCCTTCTCGTTGTACCAAAATAGAGATTTGATTTAAACGACCAGGTACAGCATCACATTTGACACCTGAGGAA

B. oleracea f LR1-1 (1400) AATCTCACTGCACTGACCATAGTAAACTCCTTCTCGTTGTACCAAAATAGAGATTTGATTTAAACGACCAGGTACAGCATCACATTTGACACCTGAGGAA

B. oleracea f LR1-2 (1400) AATCTCACTGCACTGACCATAGTAAACTCCTTCTCGTTGTACCAAAATAGAGATTTGATTTAAACGACCAGGTACAGCATCACATTTGACACCTGAGGAA

1501 1600

Raphanus LRh (1500) GGTACAGCCCAACTATGAGGTACATCAGCAGATGTTACAATAATACGTAGATGAGTTTTGGCTGGTACAACCACTCTATTGTCCACTTCTAATAAACGTG

Sinapis LRh (1500) GGTACAGCCCAACTATGAGGTACATCAGCAGATGTTACAATAATACGTAGATGAGTTTTGGCTGGTACAACCACTCTATTGTCCACTTCTAATAAACGTG

B. nigra LRh (1500) GGTACAGCCCAACTATGAGGTACATCAGCAGATGTTACAATAATACGTAGATGAGTTTTGGCTGGTACAACCACTCTATTGTCCACTTCTAATAAACGTG

B. carinata LRh (1500) GGTACAGCCCAACTATGAGGTACATCAGCAGATGTTACAATAATACGTAGATGAGTTTTGGCTGGTACAACCACTCTATTGTCCACTTCTAATAAACGTG

B. rapa LR1-1 (1499) GGTACAGCCCAACTATGAGGTACATCAGCAGATGTTACAATAATACGTAGATGAGTTTTGGCTGGTACAACCACTCTATTGTCCACTTCTAATAAACGTG

B. rapa LR1-2 (1500) GGTACAGCCCAACTATGAGGTACATCAGCAGATGTTACAATAATACGTAGATGAGTTTTGGCTGGTACAACCACTCTATTGTCCACTTCTAATAAACGTG

B. juncea LR1-1 (1501) GGTACAGCCCAACTATGAGGTACATCAGCAGATGTTACAATAATACGTAGATGAGTTTTGGCTGGTACAACCACTCTATTGTCCACTTCTAATAAACGTG

B. juncea LR1-2 (1500) GGTACAGCCCAACTATGAGGTACATCAGCAGATGTTACAATAATACGTAGATGAGTTTTGGCTGGTACAACCACTCTATTGTCCACTTCTAATAAACGTG

B napus pol LR1-1 (1500) GGTACAGCCCAACTATGAGGTACATCAGCAGATGTTACAATAATACGTAGATGAGTTTTGGCTGGTACAACCACTCTATTGTCCACTTCTAATAAACGTG

B napus pol LR1-2 (1500) GGTACAGCCCAACTATGAGGTACATCAGCAGATGTTACAATAATACGTAGATGAGTTTTGGCTGGTACAACCACTCTATTGTCCACTTCTAATAAACGTG

B. oleracea f LR1-1 (1500) GGTACAGCCCAACTATGAGGTACATCAGCAGATGTTACAATAATACGTAGATGAGTTTTGGCTGGTACAACCACTCTATTGTCCACTTCTAATAAACGTG

B. oleracea f LR1-2 (1500) GGTACAGCCCAACTATGAGGTACATCAGCAGATGTTACAATAATACGTAGATGAGTTTTGGCTGGTACAACCACTCTATTGTCCACTTCTAATAAACGTG

1601 1700

Raphanus LRh (1600) ATTGACCCAATTCTAGATCTTCTTCTGGAATCATATAACTGTCAAAAGTGAGTGACTGCTCATCGGAACTGTTATAGTCAGAATACTCATAAGTCCGATA

Sinapis LRh (1600) ATTGACCCAATTCTAGATCTTCTTCTGGAATCATATAACTGTCAAAAGTGAGTGACTGCTCATCGGAACTGTTATAGTCAGAATACTCATAAGTCCGATA

B. nigra LRh (1600) ATTGACCCAATTCTAGATCTTCTTCTGGAATCATATAACTGTCAAAAGTGAGTGACTGCTCATCGGAACTGTTATAGTCAGAATACTCATAAGTCCGATA

B. carinata LRh (1600) ATTGACCCAATTCTAGATCTTCTTCTGGAATCATATAACTGTCAAAAGTGAGTGACTGCTCATCGGAACTGTTATAGTCAGAATACTCATAAGTCCGATA

B. rapa LR1-1 (1599) ATTGACCCAATTCTAGATCTTCTTCTGGAATCATATAACTGTCAAAAGTGAGTGACTGCTCATCGGAACTGTTATAGTCAGAATACTCATAAGTCCAATA

B. rapa LR1-2 (1600) ATTGACCCAATTCTAGATCTTCTTCTGGAATCATATAACTGTCAAAAGTGAGTGACTGCTCATCGGAACTGTTATAGTCAGAATACTCATAAGTCCAATA

B. juncea LR1-1 (1601) ATTGACCCAATTCTAGATCTTCTTCTGGAATCATATAACTGTCAAAAGTGAGTGACTGCTCATCGGAACTGTTATAGTCAGAATACTCATAAGTCCAATA

B. juncea LR1-2 (1600) ATTGACCCAATTCTAGATCTTCTTCTGGAATCATATAACTGTCAAAAGTGAGTGACTGCTCATCGGAACTGTTATAGTCAGAATACTCATAAGTCCAATA

B napus pol LR1-1 (1600) ATTGACCCAATTCTAGATCTTCTTCTGGAATCATATAACTGTCAAAAGTGAGTGACTGCTCATCGGAACTGTTATAGTCAGAATACTCATAAGTCCAATA

B napus pol LR1-2 (1600) ATTGACCCAATTCTAGATCTTCTTCTGGAATCATATAACTGTCAAAAGTGAGTGACTGCTCATCGGAACTGTTATAGTCAGAATACTCATAAGTCCAATA

B. oleracea f LR1-1 (1600) ATTGACCCAATTCTAGATCTTCTTCTGGAATCATATAACTGTCAAAAGTGAGTGACTGCTCATCGGAACTGTTATAGTCAGAATACTCATAAGTCCAATA

B. oleracea f LR1-2 (1600) ATTGACCCAATTCTAGATCTTCTTCTGGAATCATATAACTGTCAAAAGTGAGTGACTGCTCATCGGAACTGTTATAGTCAGAATACTCATAAGTCCAATA

1701 1800

Raphanus LRh (1700) CCATTGATGTCCAATAGCTTTGATAGTAATGGCTGGATCTACTACTACCTCGTCCATTGAGTATAAGAGAGCAAATGATGGTATAGCAATGAACATCGAG

Sinapis LRh (1700) CCATTGATGTCCAATAGCTTTGATAGTAATGGCTGGATCTACTACTACCTCGTCCATTGAGTATAAGAGAGCAAATGATGGTATAGCAATGAACATCGAG

B. nigra LRh (1700) CCATTGATGTCCAATAGCTTTGATAGTAATGGCTGGATCTACTACTACCTCGTCCATTGAGTATAAGAGAGCAAATGATGGTATAGCAATGAACATCGAG

B. carinata LRh (1700) CCATTGATGTCCAATAGCTTTGATAGTAATGGCTGGATCTACTACTACCTCGTCCATTGAGTATAAGAGAGCAAATGATGGTATAGCAATGAACATCGAG

B. rapa LR1-1 (1699) CCATTGATGTCCAATAGCTTTGATAGTAATGGCTGGATCTACTACTACCTCGTCCATTGAGTATAAGAGAGCAAATGATGGTATAGCAATGAACATCGAG

B. rapa LR1-2 (1700) CCATTGATGTCCAATAGCTTTGATAGTAATGGCTGGATCTACTACTACCTCGTCCATTGAGTATAAGAGAGCAAATGATGGTATAGCAATGAACATCGAG

B. juncea LR1-1 (1701) CCATTGATGTCCAATAGCTTTGATAGTAATGGCTGGATCTACTACTACCTCGTCCATTGAGTATAAGAGAGCAAATGATGGTATAGCAATGAACATCGAG

B. juncea LR1-2 (1700) CCATTGATGTCCAATAGCTTTGATAGTAATGGCTGGATCTACTACTACCTCGTCCATTGAGTATAAGAGAGCAAATGATGGTATAGCAATGAACATCGAG

B napus pol LR1-1 (1700) CCATTGATGTCCAATAGCTTTGATAGTAATGGCTGGATCTACTACTACCTCGTCCATTGAGTATAAGAGAGCAAATGATGGTATAGCAATGAACATCGAG

B napus pol LR1-2 (1700) CCATTGATGTCCAATAGCTTTGATAGTAATGGCTGGATCTACTACTACCTCGTCCATTGAGTATAAGAGAGCAAATGATGGTATAGCAATGAACATCGAG

B. oleracea f LR1-1 (1700) CCATTGATGTCCAATAGCTTTGATAGTAATGGCTGGATCTACTACTACCTCGTCCATTGAGTATAAGAGAGCAAATGATGGTATAGCAATGAACATCGAG

B. oleracea f LR1-2 (1700) CCATTGATGTCCAATAGCTTTGATAGTAATGGCTGGATCTACTACTACCTCGTCCATTGAGTATAAGAGAGCAAATGATGGTATAGCAATGAACATCGAG

1801 1900

Raphanus LRh (1800) ATGAGACTAGGAAAGATGGTCCGAAGAATCTCGATAGTAGTTCCATGAACAATCCTTTGCGGGATTGCATTTTCTTTATAGTGGAAATGCCATAAAGCGC

Sinapis LRh (1800) ATGAGACTAGGAAAGATGGTCCGAAGAATCTCGATAGTAGTTCCATGAACAATCCTTTGCGGGATTGCATTTTCTTTATAGTGGAAATGCCATAAAGCGC

B. nigra LRh (1800) ATGAGACTAGGAAAGATGGTCCGAAGAATCTCGATAGTAGTTCCATGAACAATCCTTTGCGGGATTGCATTTTCTTTATAGTGGAAATGCCATAAAGCGC

B. carinata LRh (1800) ATGAGACTAGGAAAGATGGTCCGAAGAATCTCGATAGTAGTTCCATGAACAATCCTTTGCGGGATTGCATTTTCTTTATAGTGGAAATGCCATAAAGCGC

B. rapa LR1-1 (1799) ATGAGACTAGGAAAGATGGTCCGAAGAATCTCGATAGTAGTTCCATGAACAATCCTTTGCGGGATTGCATTTTCTTTATAGTGGAAATGCCATAAAGCGC

B. rapa LR1-2 (1800) ATGAGACTAGGAAAGATGGTCCGAAGAATCTCGATAGTAGTTCCATGAACAATCCTTTGCGGGATTGCATTTTCTTTATAGTGGAAATGCCATAAAGCGC

B. juncea LR1-1 (1801) ATGAGACTAGGAAAGATGGTCCGAAGAATCTCGATAGTAGTTCCATGAACAATCCTTTGCGGGATTGCATTTTCTTTATAGTGGAAATGCCATAAAGCGC

B. juncea LR1-2 (1800) ATGAGACTAGGAAAGATGGTCCGAAGAATCTCGATAGTAGTTCCATGAACAATCCTTTGCGGGATTGCATTTTCTTTATAGTGGAAATGCCATAAAGCGC

B napus pol LR1-1 (1800) ATGAGACTAGGAAAGATGGTCCGAAGAATCTCGATAGTAGTTCCATGAACAATCCTTTGCGGGATTGCATTTTCTTTATAGTGGAAATGCCATAAAGCGC

B napus pol LR1-2 (1800) ATGAGACTAGGAAAGATGGTCCGAAGAATCTCGATAGTAGTTCCATGAACAATCCTTTGCGGGATTGCATTTTCTTTATAGTGGAAATGCCATAAAGCGC

B. oleracea f LR1-1 (1800) ATGAGACTAGGAAAGATGGTCCGAAGAATCTCGATAGTAGTTCCATGAACAATCCTTTGCGGGATTGCATTTTCTTTATAGTGGAAATGCCATAAAGCGC

B. oleracea f LR1-2 (1800) ATGAGACTAGGAAAGATGGTCCGAAGAATCTCGATAGTAGTTCCATGAACAATCCTTTGCGGGATTGCATTTTCTTTATAGTGGAAATGCCATAAAGCGC

1901 2000

Raphanus LRh (1900) GAACCAAGATCCATAATACGAAAACCAAAATCAGAATGAGGAAGAAAAAGATATCGTGATGTAAGTCTATTATTCCTTGCATTATAGGTGTAGCTGCGTC

Sinapis LRh (1900) GAACCAAGATCCATAATACGAAAACCAAAATCAGAATGAGGAAGAAAAAGATATCGTGATGTAAGTCTATTATTCCTTGCATTATAGGTGTAGCTGCGTC

B. nigra LRh (1900) GAACCAAGATCCATAATACGAAAACCAAAATCAGAATGAGGAAGAAAAAGATATCGTGATGTAAGTCTATTATTCCTTGCATTATAGGTGTAGCTGCGTC

B. carinata LRh (1900) GAACCAAGATCCATAATACGAAAACCAAAATCAGAATGAGGAAGAAAAAGATATCGTGATGTAAGTCTATTATTCCTTGCATTATAGGTGTAGCTGCGTC

B. rapa LR1-1 (1899) GAACCAAGATCCATAATACGAAAACCAAAATCAGAATGAGGAAGAAAAAGATATCGTGATGTAAGTCTATTATTCCTTGCATTATAGGTGTAGCTGCGTC

B. rapa LR1-2 (1900) GAACCAAGATCCATAATACGAAAACCAAAATCAGAATGAGGAAGAAAAAGATATCGTGATGTAAGTCTATTATTCCTTGCATTATAGGTGTAGCTGCGTC

B. juncea LR1-1 (1901) GAACCAAGATCCATAATACGAAAACCAAAATCAGAATGAGGAAGAAAAAGATATCGTGATGTAAGTCTATTATTCCTTGCATTATAGGTGTAGCTGCGTC

B. juncea LR1-2 (1900) GAACCAAGATCCATAATACGAAAACCAAAATCAGAATGAGGAAGAAAAAGATATCGTGATGTAAGTCTATTATTCCTTGCATTATAGGTGTAGCTGCGTC

B napus pol LR1-1 (1900) GAACCAAGATCCATAATACGAAAACCAAAATCAGAATGAGGAAGAAAAAGATATCGTGATGTAAGTCTATTATTCCTTGCATTATAGGTGTAGCTGCGTC

B napus pol LR1-2 (1900) GAACCAAGATCCATAATACGAAAACCAAAATCAGAATGAGGAAGAAAAAGATATCGTGATGTAAGTCTATTATTCCTTGCATTATAGGTGTAGCTGCGTC

B. oleracea f LR1-1 (1900) GAACCAAGATCCATAATACGAAAACCAAAATCAGAATGAGGAAGAAAAAGATATCGTGATGTAAGTCTATTATTCCTTGCATTATAGGTGTAGCTGCGTC

B. oleracea f LR1-2 (1900) GAACCAAGATCCATAATACGAAAACCAAAATCAGAATGAGGAAGAAAAAGATATCGTGATGTAAGTCTATTATTCCTTGCATTATAGGTGTAGCTGCGTC

2001 2100

Raphanus LRh (2000) TTGAGATCCTAATTGCCATGGTTCCGCTGCATCACAAGGAGAAATTGTGAGGAATAACCATTTTAGAACAATCGTTTTCAAAGCAAAGGTTCCTTCATTG

Sinapis LRh (2000) TTGAGATCCTAATTGCCATGGTTCCGCTGCATCACAAGGAGAAATTGTGAGGAATAACCATTTTAGAACAATCATTTTCAAAGCAAAGGTTCCTTCATTG

B. nigra LRh (2000) TTGAGATCCTAATTGCCATGGTTCCGCTGCATCACAAGGAGAAATTGTGAGGAATAACCATTTTAGAACAATCATTTTCAAAGCAAAGGTTCCTTCATTG

B. carinata LRh (2000) TTGAGATCCTAATTGCCATGGTTCCGCTGCATCACAAGGAGAAATTGTGAGGAATAACCATTTTAGAACAATCATTTTCAAAGCAAAGGTTCCTTCATTG

B. rapa LR1-1 (1999) TTGAGATCCTAATTGCCATGGTTCCGCTGCATCACAAGGAGAAATTGTGAGGAATAACCATTTTAGAACAATCATTTTCAAAGCAAAGGTTCCTTCATTG

B. rapa LR1-2 (2000) TTGAGATCCTAATTGCCATGGTTCCGCTGCATCACAAGGAGAAATTGTGAGGAATAACCATTTTAGAACAATCATTTTCAAAGCAAAGGTTCCTTCATTG

B. juncea LR1-1 (2001) TTGAGATCCTAATTGCCATGGTTCCGCTGCATCACAAGGAGAAATTGTGAGGAATAACCATTTTAGAACAATCATTTTCAAAGCAAAGGTTCCTTCATTG

B. juncea LR1-2 (2000) TTGAGATCCTAATTGCCATGGTTCCGCTGCATCACAAGGAGAAATTGTGAGGAATAACCATTTTAGAACAATCATTTTCAAAGCAAAGGTTCCTTCATTG

B napus pol LR1-1 (2000) TTGAGATCCTAATTGCCATGGTTCCGCTGCATCACAAGGAGAAATTGTGAGGAATAACCATTTTAGAACAATCATTTTCAAAGCAAAGGTTCCTTCATTG

B napus pol LR1-2 (2000) TTGAGATCCTAATTGCCATGGTTCCGCTGCATCACAAGGAGAAATTGTGAGGAATAACCATTTTAGAACAATCATTTTCAAAGCAAAGGTTCCTTCATTG

B. oleracea f LR1-1 (2000) TTGAGATCCTAATTGCCATGGTTCCGCTGCATCACAAGGAGAAATTGTGAGGAATAACCATTTTAGAACAATCATTTTCAAAGCAAAGGTTCCTTCATTG

B. oleracea f LR1-2 (2000) TTGAGATCCTAATTGCCATGGTTCCGCTGCATCACAAGGAGAAATTGTGAGGAATAACCATTTTAGAACAATCATTTTCAAAGCAAAGGTTCCTTCATTG

2101 2200

Raphanus LRh (2100) ACTGCTCCGCTCCCCCCCCAAACAAAGAGAGACTGATTCTGACTCTCCCAATTAAGGAAGACGGAAATGACTGGTGCCGGTTGGTCCAACCAAGAAAAAA

Sinapis LRh (2100) ACTGCTCCGCTCCCCCCC-AAACAAAGAGAGACTGATTCTGACTCTCCCAATTAAGGAAGACGGAAATGACTGGTGCCGGTTGGTCCAACCAAGAAAAAA

B. nigra LRh (2100) ACTGCTCCGCTCCCCCCC-AAACAAAGAGAGACTGATTCTGACTCTCCCAATTAAGGAAGACGGAAATGACTGGTGCCGGTTGGTCCAACCAAGAAAAAA

B. carinata LRh (2100) ACTGCTCCGCTCCCCCCC-AAACAAAGAGAGACTGATTCTGACTCTCCCAATTAAGGAAGACGGAAATGACTGGTGCCGGTTGGTCCAACCAAGAAAAAA

B. rapa LR1-1 (2099) ACTGCTCCGCTCCCCCCCCAAACAAAGAGAGACTGATTCTGACTCTCCCAATTAAGGAAGACGGAAATGACTGGTGCCGGTTGGTCCAACCAAGAAAAAA

B. rapa LR1-2 (2100) ACTGCTCCGCTCCCCCCCCAAACAAAGAGAGACTGATTCTGACTCTCCCAATTAAGGAAGACGGAAATGACTGGTGCCGGTTGGTCCAACCAAGAAAAAA

B. juncea LR1-1 (2101) ACTGCTCCGCTCCCCCCCCAAACAAAGAGAGACTGATTCTGACTCTCCCAATTAAGGAAGACGGAAATGACTGGTGCCGGTTGGTCCAACCAAGAAAAAA

B. juncea LR1-2 (2100) ACTGCTCCGCTCCCCCCCCAAACAAAGAGAGACTGATTCTGACTCTCCCAATTAAGGAAGACGGAAATGACTGGTGCCGGTTGGTCCAACCAAGAAAAAA

B napus pol LR1-1 (2100) ACTGCTCCGCTCCCCCCCCAAACAAAGAGAGACTGATTCTGACTCTCCCAATTAAGGAAGACGGAAATGACTGGTGCCGGTTGGTCCAACCAAGAAAAAA

B napus pol LR1-2 (2100) ACTGCTCCGCTCCCCCCCCAAACAAAGAGAGACTGATTCTGACTCTCCCAATTAAGGAAGACGGAAATGACTGGTGCCGGTTGGTCCAACCAAGAAAAAA

B. oleracea f LR1-1 (2100) ACTGCTCCGCTCCCCCCCCAAACAAAGAGAGACTGATTCTGACTCTCCCAATTAAGGAAGACGGAAATGACTGGTGCCGGTTGGTCCAACCAAGAAAAAA

B. oleracea f LR1-2 (2100) ACTGCTCCGCTCCCCCCCCAAACAAAGAGAGACTGATTCTGACTCTCCCAATTAAGGAAGACGGAAATGACTGGTGCCGGTTGGTCCAACCAAGAAAAAA

2201 2300

Raphanus LRh (2200) GAGATGGGAATTTTGGGCGTAAGATTCTTCTTCTTCTTACA-----ATATTTTGAGTTAGATGAACAGA--TCACTCCTCTAAGCAGCCTTCTTCTTATA

Sinapis LRh (2199) GAGATGGGAATTTTGGGCGTAAGATTCTTCTTCTTCTTACA-----ATATTTTGAGTTAGATGAACAGAGATCACTCCACAAAGCGGCCTTCTTCTTATA

B. nigra LRh (2199) GAGATGGGAATTTTGGGCGTAAGATTCTTCTTCTTCTTACA-----ATATTTTGAGTTAGATGAACAGAGATCACTCCTCTAAGCAGCCTTCTTCTTATA

B. carinata LRh (2199) GAGATGGGAATTTTGGGCGTAAGATTCTTCTTCTTCTTACA-----ATATTTTGAGTTAGATGAACAGAGATCACTCCTCTAAGCAGCCTTCTTCTTATA

B. rapa LR1-1 (2199) GAGATGGGAATTTTGGGCGTAAGATTCTTCTTCTTCTTACATTACAATATTTTGAGTTAGATGAACAGA--TCACTCCTCTAAGCAGCCGTCTTCTTATA

B. rapa LR1-2 (2200) GAGATGGGAATTTTGGGCGTAAGATTCTTCTTCTTCTTACATTACAATATTTTGAGTTAGATGAACAGA--TCACTCCTCTAAGCAGCCGTCTTCTTATA

B. juncea LR1-1 (2201) GAGATGGGAATTTTGGGCGTAAGATTCTTCTTCTTCTTACATTACAATATTTTGAGTTAGATGAACAGA--TCACTCCTCTAAGCAGCCGTCTTCTTATA

B. juncea LR1-2 (2200) GAGATGGGAATTTTGGGCGTAAGATTCTTCTTCTTCTTACATTACAATATTTTGAGTTAGATGAACAGA--TCACTCCTCTAAGCAGCCGTCTTCTTATA

B napus pol LR1-1 (2200) GAGATGGGAATTTTGGGCGTAAGATTCTTCTTCTTCTTACATTACAATATTTTGAGTTAGATGAACAGA--TCACTCCTCTAAGCAGCCGTCTTCTTATA

B napus pol LR1-2 (2200) GAGATGGGAATTTTGGGCGTAAGATTCTTCTTCTTCTTACATTACAATATTTTGAGTTAGATGAACAGA--TCACTCCTCTAAGCAGCCGTCTTCTTATA

B. oleracea f LR1-1 (2200) GAGATGGGAATTTTGGGCGTAAGATTCTTCTTCTTCTTACATTACAATATTTTGAGTTAGATGAACAGA--TCACTCCTCTAAGCAGCCGTCTTCTTATA

B. oleracea f LR1-2 (2200) GAGATGGGAATTTTGGGCGTAAGATTCTTCTTCTTCTTACATTACAATATTTTGAGTTAGATGAACAGA--TCACTCCTCTAAGCAGCCGTCTTCTTATA

2301 2400

Raphanus LRh (2293) TACATATTATTCTGTCATGGGTTGTTAGCTGTGTTCTATCGTAGCTATCTCTGTTCAACACTTGGAGGGAGCGAGCAACGGCCTGCGAGCGATCGTAGCT

Sinapis LRh (2294) TACGTATTATTCTGTCATGGGTTGTTAGCTGTGTTCTATCGTAGCTATCTCTGTTCAACACTTGGAGGGAGCGAGCAACGGCCTGCGAGCGATCGTAGCT

B. nigra LRh (2294) TACATATTATTCTGTCATGGGTTGTTAGCTGTGTTCTATCGTAGCTATCTCTGTTCAACACTTGGAGGGAGCGAGCAACGGCCTGCGAGCGATCGTAGCT

B. carinata LRh (2294) TACATATTATTCTGTCATGGGTTGTTAGCTGTGTTCTATCGTAGCTATCTCTGTTCAACACTTGGAGGGAGCGAGCAACGGCCTGCGAGCGATCGTAGCT

B. rapa LR1-1 (2297) TACATATTATTCTGTCATGGGTTGTTAGCTGTGTTCTATCGTAGCTATCTCTGTTCAACACTTGGAGGGAGCGAGCAACGGCCTGCGAGCGATCGTAGCT

B. rapa LR1-2 (2298) TACATATTATTCTGTCATGGGTTGTTAGCTGTGTTCTATCGTAGCTATCTCTGTTCAACACTTGGAGGGAGCGAGCAACGGCCTGCGAGCGATCGTAGCT

B. juncea LR1-1 (2299) TACATATTATTCTGTCATGGGTTGTTAGCTGTGTTCTATCGTAGCTATCTCTGTTCAACACTTGGAGGGAGCGAGCAACGGCCTGCGAGCGATCGTAGCT

B. juncea LR1-2 (2298) TACATATTATTCTGTCATGGGTTGTTAGCTGTGTTCTATCGTAGCTATCTCTGTTCAACACTTGGAGGGAGCGAGCAACGGCCTGCGAGCGATCGTAGCT

B napus pol LR1-1 (2298) TACATATTATTCTGTCATGGGTTGTTAGCTGTGTTCTATCGTAGCTATCTCTGTTCAACACTTGGAGGGAGCGAGCAACGGCCTGCGAGCGATCGTAGCT

B napus pol LR1-2 (2298) TACATATTATTCTGTCATGGGTTGTTAGCTGTGTTCTATCGTAGCTATCTCTGTTCAACACTTGGAGGGAGCGAGCAACGGCCTGCGAGCGATCGTAGCT

B. oleracea f LR1-1 (2298) TACATATTATTCTGTCATGGGTTGTTAGCTGTGTTCTATCGTAGCTATCTCTGTTCAACACTTGGAGGGAGCGAGCAACGGCCTGCGAGCGATCGTAGCT

B. oleracea f LR1-2 (2298) TACATATTATTCTGTCATGGGTTGTTAGCTGTGTTCTATCGTAGCTATCTCTGTTCAACACTTGGAGGGAGCGAGCAACGGCCTGCGAGCGATCGTAGCT

2401 2500

Raphanus LRh (2393) ACTTCCCTTAGTTTTGTTTCAAACTCTTCTCTT----TTTTCCTTTTTTCTTACTTTTCCATCTATATAAAGAGAAAGTTTTGGATTCCTGATGT-GCTC

Sinapis LRh (2394) ACTTCCCTTAGTTTTGTTTCAAACTCTTCTCTT----TTTTCCTTTTTTCTTACTTTTCCATCTATATAAAGAGAAAGTTTTGGATTCCTGATGT-GCTC

B. nigra LRh (2394) ACTTCCCTTAGTTTTGTTTCAAACTCTTCTCTT----TTTTCCTTTTTTCTTACTTTTCCATCTATATAAAGAGAAAGTTTTGGATTCCTGATGT-GCTC

B. carinata LRh (2394) ACTTCCCTTAGTTTTGTTTCAAACTCTTCTCTT----TTTTCCTTTTTTCTTACTTTTCCATCTATATAAAGAGAAAGTTTTGGATTCCTGATGT-GCTC

B. rapa LR1-1 (2397) ACTTCCCTTAGTTTTGTTTCAAACTCTTCTATTACAGTACAGAGGATTAGTCCCATTTTCGTCACGATCGATCCAC-GCCCGGGCTTAGAAAGCTAGCTT

B. rapa LR1-2 (2398) ACTTCCCTTAGTTTTGTTTCAAACTCTTCTCTT----TTTTCCTTTTTTCTTACTTTTCCATCTATATAAAGAGAAAGTTTTGGATTCCTGATGT-GCTC

B. juncea LR1-1 (2399) ACTTCCCTTAGTTTTGTTTCAAACTCTTCTATTACAGTACAGAGGATTAGTCCCATTTTCGTCACGATCGATCCAC-GCCCGGGCTTAGAAAGCTAGCTT

B. juncea LR1-2 (2398) ACTTCCCTTAGTTTTGTTTCAAACTCTTCTCTT----TTTTCCTTTTTTCTTACTTTTCCATCTATATAAAGAGAAAGTTTTGGATTCCTGATGT-GCTC

B napus pol LR1-1 (2398) ACTTCCCTTAGTTTTGTTTCAAACTCTTCTATTACAGTACAGAGGATTAGTCCCATTTTCGTCACGATCGATCCAC-GCCCGGGCTTAGAAAGCTAGCTT

B napus pol LR1-2 (2398) ACTTCCCTTAGTTTTGTTTCAAACTCTTCTCTT----TTTTCCTTTTTTCTTACTTTTCCATCTATATAAAGAGAAAGTTTTGGATTCCTGATGT-GCTC

B. oleracea f LR1-1 (2398) ACTTCCCTTAGTTTTGTTTCAAACTCTTCTATTACAGTACAGAGGATTAGTCCCATTTTCGTCACGATCGATCCAC-GCCCGGGCTTAGAAAGCTAGCTT

B. oleracea f LR1-2 (2398) ACTTCCCTTAGTTTTGTTTCAAACTCTTCTATT----TTTTCCTTTTTTCTTACTTTTCCATCTATATAAAGAGAAAGTTTTGGATTCCTGATGT-GCTC

2501 2513

Raphanus LRh (2488) CGTAGAGCTAAAA

Sinapis LRh (2489) CGTAGAGCTAAA-

B. nigra LRh (2489) CGTAGAGCTAAA-

B. carinata LRh (2489) CGTAGAGCTAAA-

B. rapa LR1-1 (2496) ACTAA--------

B. rapa LR1-2 (2493) CGTAGAGC-----

B. juncea LR1-1 (2498) ACT----------

B. juncea LR1-2 (2493) CGTAGAGC-----

B napus pol LR1-1 (2497) ACTA---------

B napus pol LR1-2 (2493) CGTAGAGC-----

B. oleracea f LR1-1 (2497) ACTA---------

B. oleracea f LR1-2 (2493) CGTAGAGC-----

Part B, fasta format

>Raphanus_LRh

CTAGGAACAGCTTCTACGACGATAGATAGGGGTCAGCTTTCTTTGGCATCTATGCCCCCTGCCC.TCCAAACAGTATGGGAGCCTTTCAGCTCGTACTGCTCACACTCCTAGATCTTCACGGCACCTCCTCCACCATAGTGTGAGCTGCTCCCAGCGGAGAAAAGCAAGGCCTACTTCGAAATTAGCTTTCAACAACGTCAACAACACCACGAAAAAAGTCAACAATGGTTGCCCACTAATCTGATCATAGGTGAAATCCAATCCCTTCGCTTCGCGCCAGGCTTTGAAACCGTAAGTCAGGCGCCTTCGGCCCTCTCCTTTCAGTCGAGTTGCTAAAGCACCTCTCGGAAGCGAGAAAGCGAGCAGCAAGCTGAAAAAAGGGAAAAGTGGTTTTATAAAGCAAAATAAGCTAAGGGGGCTGGCTAGGAATCGCAAGAATTGAGAAGGGTGGGAAAGACAGGTTCGGAAATAGCCGGATTAGCAGGAGGAAGGTCTTGAAGAGCCTGAAACAAAGAAAGGTGTACATAAAAAAAGAGGCTGGTTATGGCCTTTACTTGATAGGACTCCTTTCCCATCTATCTTGACCGGGAAGAGGGGATAAAAAACCTTGCTAACGCCCTGCCCACCCTTCTGGATCCCTCATATTTATGATTCCAGGCTTCCCGGACTCGTAATAGACGGCTAAGAACAAGAAGAGGGTCAGTAGTCTCTGCCGTTGCAGGTCCTTCTCCTTCCGCTGAGACGGCCCTCTTTTTTTGTTTGTTCACCGCGGCACGAAATCATGAAGAAGCTGGAATAACTCAGAAAGAGAGTGGCGCCTAGCCGTTGAGAGCGTCTATTATCTTTGTAGAGGAACAGTACGATCTTGGACTGGCCCCCTTCGCATGACCTAGAAAGATAAAGAAGTCCATGCTACTATAAGGCCTCTAAACTCCTCCCTCAGGACACTATTGCGTTGCCCATGGGGACGGGGTAGCCCCGACTTCCATAGGTCCTTGGTTCGACCTCCTAATGAGAATTGAGGTCCTTGCGCGGGCGTCTCATCCCTAAGACTTGCTTGCTCTGTATGGAGTGCCCTGTGGTTCCTCGAGTGCCAGCCGCAGAAAGGAATGCCATCAACTAGGGCGCTATTGGCCACTAACCACTCGCTCGCCAGCCGCTCGGGCTCCGCGTTTCAAGTTCGTTATCCTAACCGTCCCCTCTGCTCCACCGGGTGCCTGGCCCCTTCTTCTATCTTATCTACTGCCTTGCTCCTCGGCTCCCTACAGCTCCAGCCGCTCGCTGTAATAGCTTGCTTCTCGGGTGGCTCGCACCCCCGGGTGGTGCGGCTGAGCCAGAGTGGGCTCAACAGTCGGCCTATGTTTCCGGGCGCACGCGTAAAGGCATGATTAGTTCCACAAATCTCACTGCACTGACCATAGTAAACTCCTTCTCGTTGTACCAAAATAGAGATTTGATTTAAACGACCAGGTACAGCATCACATTTGACACCTGAGGAAGGTACAGCCCAACTATGAGGTACATCAGCAGATGTTACAATAATACGTAGATGAGTTTTGGCTGGTACAACCACTCTATTGTCCACTTCTAATAAACGTGATTGACCCAATTCTAGATCTTCTTCTGGAATCATATAACTGTCAAAAGTGAGTGACTGCTCATCGGAACTGTTATAGTCAGAATACTCATAAGTCCGATACCATTGATGTCCAATAGCTTTGATAGTAATGGCTGGATCTACTACTACCTCGTCCATTGAGTATAAGAGAGCAAATGATGGTATAGCAATGAACATCGAGATGAGACTAGGAAAGATGGTCCGAAGAATCTCGATAGTAGTTCCATGAACAATCCTTTGCGGGATTGCATTTTCTTTATAGTGGAAATGCCATAAAGCGCGAACCAAGATCCATAATACGAAAACCAAAATCAGAATGAGGAAGAAAAAGATATCGTGATGTAAGTCTATTATTCCTTGCATTATAGGTGTAGCTGCGTCTTGAGATCCTAATTGCCATGGTTCCGCTGCATCACAAGGAGAAATTGTGAGGAATAACCATTTTAGAACAATCGTTTTCAAAGCAAAGGTTCCTTCATTGACTGCTCCGCTCCCCCCCCAAACAAAGAGAGACTGATTCTGACTCTCCCAATTAAGGAAGACGGAAATGACTGGTGCCGGTTGGTCCAACCAAGAAAAAAGAGATGGGAATTTTGGGCGTAAGATTCTTCTTCTTCTTACA.....ATATTTTGAGTTAGATGAACAGA..TCACTCCTCTAAGCAGCCTTCTTCTTATATACATATTATTCTGTCATGGGTTGTTAGCTGTGTTCTATCGTAGCTATCTCTGTTCAACACTTGGAGGGAGCGAGCAACGGCCTGCGAGCGATCGTAGCTACTTCCCTTAGTTTTGTTTCAAACTCTTCTCTT....TTTTCCTTTTTTCTTACTTTTCCATCTATATAAAGAGAAAGTTTTGGATTCCTGATGT.GCTCCGTAGAGCTAAAA

>Sinapis_LRh

CTAGGAACAGCTTCTACGACGATAGATAGGGGTCAGCTTTCTTTGGCATCTATGCCCCCTGCCC.TCCAAACAGTATGGGAGCCTTTCAGCTCGTACTGCTCACACTCCTAGATCTTCACGGCACCTCCTCCACCATAGTGTGAGCTGCTCCCAGCGGAGAAAAGCAAGGCCTACTTCGAAATTAGCTTTCAACAACGTCAACAACACCACGAAAAAAGTCAACAATGGTTGCCCACTAATCTGATCATAGGTGAAATCCAATCCCTTCGCTTCGCGCCAGGCTTTGAAACCGTAAGTCAGGCGCCTTCGGCCCTCTCCTTTCAGTCGAGTTGCTAAAGCACCTCTCGGAAGCGAGAAAGCGAGCAGCAAGCTGAAAAAAGGGAAAAGTGGTTTTATAAAGCAAAATAAGCTAAGGGGGCTGGCTAGGAATCGCAAGAATTGAGAAGGGTGGGAAAGACAGGTTCGGAAATGGCCGGATTAGCAGGAGGAAGGTCTTGAAGAGCCTGAAACAAAGAAAGGTGTACATAAAAAAAGAGGCTGGTTATGGCCTTTACTTGATAGGACTCCTTTCCCATCTATCTTGACCGGGAAGAGGGGATAAAAAACCTTGCTAACGCCCTGCCCACCCTTCTGGATCCCTCATATTTATGATTCCAGGCTTCCCGGACTCGTAATAGACGGCTAAGAACAAGAAGAGGGTCAGTAGTCTCTGCCGTTGCAGGTCCTTCTCCTTCCGCTGAGACGGCCCTCTTTTTTTGTTTGTTCACCGCGGCACGAAATCATGAAGAAGCTGGAATAACTCAGAAAGAGAGTGGCGCCTAGCCGTTGAGAGCGTCTATTATCTTTGTAGAGGAACAGTACGATCTTGGACTGGCCCCCTTCGCATGACCTAGAAAGATAAAGAAGTCCATGCTACTATAAGGCCTCTAAACTCCTCCCTCAGGACACTATTGCGTTGCCCATGGGGACGGGGTAGCCCCGACTTCCATAGGTCCTTGGTTCGACCTCCTAATGAGAATTGAGGTCCTTGCGCGGGCGTCTCATCCCTAAGACTTGCTTGCTCTGTATGGAGTGCCCTGTGGTTCCTCGAGTGCCAGCCGCAGAGAGGAATGCCATCAACTAGGGCGCTATTGGCCACTAACCACTCGCTCGCCAGCCGCTCGGGCTCCGCGTTTCAAGTTCGTTATCCTAACCGTCCCCTCTGCTCCACCGGGTGCCTGGCCCCTTCTTCTATCTTATCTACTGCCTTGCTCCTCGGCTCCCTACAGCTCCAGCCGCTCGCTGTAATAGCTTGCTTCTCGGGTGGCTCGCACCCCCGGGTGGTGCGGCTGAGCCAGAGTGGGCTCAACAGTCGGCCTATGTTTCCGGGCGCACGCGTAAAGGCATGATTAGTTCCACAAATCTCACTGCACTGACCATAGTAAACTCCTTCTCGTTGTACCAAAATAGAGATTTGATTTAAACGACCAGGTACAGCATCACATTTGACACCTGAGGAAGGTACAGCCCAACTATGAGGTACATCAGCAGATGTTACAATAATACGTAGATGAGTTTTGGCTGGTACAACCACTCTATTGTCCACTTCTAATAAACGTGATTGACCCAATTCTAGATCTTCTTCTGGAATCATATAACTGTCAAAAGTGAGTGACTGCTCATCGGAACTGTTATAGTCAGAATACTCATAAGTCCGATACCATTGATGTCCAATAGCTTTGATAGTAATGGCTGGATCTACTACTACCTCGTCCATTGAGTATAAGAGAGCAAATGATGGTATAGCAATGAACATCGAGATGAGACTAGGAAAGATGGTCCGAAGAATCTCGATAGTAGTTCCATGAACAATCCTTTGCGGGATTGCATTTTCTTTATAGTGGAAATGCCATAAAGCGCGAACCAAGATCCATAATACGAAAACCAAAATCAGAATGAGGAAGAAAAAGATATCGTGATGTAAGTCTATTATTCCTTGCATTATAGGTGTAGCTGCGTCTTGAGATCCTAATTGCCATGGTTCCGCTGCATCACAAGGAGAAATTGTGAGGAATAACCATTTTAGAACAATCATTTTCAAAGCAAAGGTTCCTTCATTGACTGCTCCGCTCCCCCCC.AAACAAAGAGAGACTGATTCTGACTCTCCCAATTAAGGAAGACGGAAATGACTGGTGCCGGTTGGTCCAACCAAGAAAAAAGAGATGGGAATTTTGGGCGTAAGATTCTTCTTCTTCTTACA.....ATATTTTGAGTTAGATGAACAGAGATCACTCCACAAAGCGGCCTTCTTCTTATATACGTATTATTCTGTCATGGGTTGTTAGCTGTGTTCTATCGTAGCTATCTCTGTTCAACACTTGGAGGGAGCGAGCAACGGCCTGCGAGCGATCGTAGCTACTTCCCTTAGTTTTGTTTCAAACTCTTCTCTT....TTTTCCTTTTTTCTTACTTTTCCATCTATATAAAGAGAAAGTTTTGGATTCCTGATGT.GCTCCGTAGAGCTAAA.

>B._nigra_LRh

CTAGGAACAGCTTCTACGACGATAGATAGGGGTCAGCTTTCTTTGGCATCTATGCCCCCTGCCC.TCCAAACAGTATGGGAGCCTTTCAGCTCGTACTGCTCACACTCCTAGATCTTCACGGCACCTCCTCCACCATAGTGTGAGCTGCTCCCAGCGGAGAAAAGCAAGGCCTACTTCGAAATTAGCTTTCAACAACGTCAACAACACCACGAAAAAAGTCAACAATGGTTGCCCACTAATCTGATCATAGGTGAAATCCAATCCCTTCGCTTCGCGCCAGGCTTTGAAACCGTAAGTCAGGCGCCTTCGGCCCTCTCCTTTCAGTCGAGTTGCTAAAGCACCTCTCGGAAGCGAGAAAGCGAGCAGCAAGCTGAAAAAAGGGAAAAGTGGTTTTATAAAGCAAAATAAGCTAAGGGGGCTGGCTAGGAATCGCAAGAATTGAGAAGGGTGGGAAAGACAGGTTCGGAAATGGCCGGATTAGCAGGAGGAAGGTCTTGAAGAGCCTGAAACAAAGAAAGGTGTACATAAAAAAAGAGGCTGGTTATGGCCTTTACTTGATAGGACTCCTTTCCCATCTATCTTGACCGGGAAGAGGGGATAAAAAACCTTGCTAACGCCCTGCCCACCCTTCTGGATCCCTCATATTTATGATTCCAGGCTTCCCGGACTCGTAATAGACGGCTAAGAACAAGAAGAGGGTCAGTAGTCTCTGCCGTTGCAGGTCCTTCTCCTTCCGCTGAGACGGCCCTCTTTTTTTGTTTGTTCACCGCGGCACGAAATCATGAAGAAGCTGGAATAACTCAGAAAGAGAGTGGCGCCTAGCCGTTGAGAGCGTCTATTATCTTTGTAGAGGAACAGTACGATCTTGGACTGGCCCCCTTCGCATGACCTAGAAAGATAAAGAAGTCCATGCTACTATAAGGCCTCTAAACTCCTCCCTCAGGACACTATTGCGTTGCCCATGGGGACGGGGTAGCCCCGACTTCCATAGGTCCTTGGTTCGACCTCCTAATGAGAATTGAGGTCCTTGCGCGGGCGTCTCATCCCTAAGACTTGCTTGCTCTGTATGGAGTGCCCTGTGGTTCCTCGAGTGCCAGCCGCAGAGAGGAATGCCATCAACTAGGGCGCTATTGGCCACTAACCACTCGCTCGCCAGCCGCTCGGGCTCCGCGTTTCAAGTTCGTTATCCTAACCGTCCCCTCTGCTCCACCGGGTGCCTGGCCCCTTCTTCTATCTTATCTACTGCCTTGCTCCTCGGCTCCCTACAGCTCCAGCCGCTCGCTGTAATAGCTTGCTTCTCGGGTGGCTCGCACCCCCGGGTGGTGCGGCTGAGCCAGAGTGGGCTCAACAGTCGGCCTATGTTTCCGGGCGCACGCGTAAAGGCATGATTAGTTCCACAAATCTCACTGCACTGACCATAGTAAACTCCTTCTCGTTGTACCAAAATAGAGATTTGATTTAAACGACCAGGTACAGCATCACATTTGACACCTGAGGAAGGTACAGCCCAACTATGAGGTACATCAGCAGATGTTACAATAATACGTAGATGAGTTTTGGCTGGTACAACCACTCTATTGTCCACTTCTAATAAACGTGATTGACCCAATTCTAGATCTTCTTCTGGAATCATATAACTGTCAAAAGTGAGTGACTGCTCATCGGAACTGTTATAGTCAGAATACTCATAAGTCCGATACCATTGATGTCCAATAGCTTTGATAGTAATGGCTGGATCTACTACTACCTCGTCCATTGAGTATAAGAGAGCAAATGATGGTATAGCAATGAACATCGAGATGAGACTAGGAAAGATGGTCCGAAGAATCTCGATAGTAGTTCCATGAACAATCCTTTGCGGGATTGCATTTTCTTTATAGTGGAAATGCCATAAAGCGCGAACCAAGATCCATAATACGAAAACCAAAATCAGAATGAGGAAGAAAAAGATATCGTGATGTAAGTCTATTATTCCTTGCATTATAGGTGTAGCTGCGTCTTGAGATCCTAATTGCCATGGTTCCGCTGCATCACAAGGAGAAATTGTGAGGAATAACCATTTTAGAACAATCATTTTCAAAGCAAAGGTTCCTTCATTGACTGCTCCGCTCCCCCCC.AAACAAAGAGAGACTGATTCTGACTCTCCCAATTAAGGAAGACGGAAATGACTGGTGCCGGTTGGTCCAACCAAGAAAAAAGAGATGGGAATTTTGGGCGTAAGATTCTTCTTCTTCTTACA.....ATATTTTGAGTTAGATGAACAGAGATCACTCCTCTAAGCAGCCTTCTTCTTATATACATATTATTCTGTCATGGGTTGTTAGCTGTGTTCTATCGTAGCTATCTCTGTTCAACACTTGGAGGGAGCGAGCAACGGCCTGCGAGCGATCGTAGCTACTTCCCTTAGTTTTGTTTCAAACTCTTCTCTT....TTTTCCTTTTTTCTTACTTTTCCATCTATATAAAGAGAAAGTTTTGGATTCCTGATGT.GCTCCGTAGAGCTAAA.

>B._carinata_LRh

CTAGGAACAGCTTCTACGACGATAGATAGGGGTCAGCTTTCTTTGGCATCTATGCCCCCTGCCC.TCCAAACAGTATGGGAGCCTTTCAGCTCGTACTGCTCACACTCCTAGATCTTCACGGCACCTCCTCCACCATAGTGTGAGCTGCTCCCAGCGGAGAAAAGCAAGGCCTACTTCGAAATTAGCTTTCAACAACGTCAACAACACCACGAAAAAAGTCAACAATGGTTGCCCACTAATCTGATCATAGGTGAAATCCAATCCCTTCGCTTCGCGCCAGGCTTTGAAACCGTAAGTCAGGCGCCTTCGGCCCTCTCCTTTCAGTCGAGTTGCTAAAGCACCTCTCGGAAGCGAGAAAGCGAGCAGCAAGCTGAAAAAAGGGAAAAGTGGTTTTATAAAGCAAAATAAGCTAAGGGGGCTGGCTAGGAATCGCAAGAATTGAGAAGGGTGGGAAAGACAGGTTCGGAAATGGCCGGATTAGCAGGAGGAAGGTCTTGAAGAGCCTGAAACAAAGAAAGGTGTACATAAAAAAAGAGGCTGGTTATGGCCTTTACTTGATAGGACTCCTTTCCCATCTATCTTGACCGGGAAGAGGGGATAAAAAACCTTGCTAACGCCCTGCCCACCCTTCTGGATCCCTCATATTTATGATTCCAGGCTTCCCGGACTCGTAATAGACGGCTAAGAACAAGAAGAGGGTCAGTAGTCTCTGCCGTTGCAGGTCCTTCTCCTTCCGCTGAGACGGCCCTCTTTTTTTGTTTGTTCACCGCGGCACGAAATCATGAAGAAGCTGGAATAACTCAGAAAGAGAGTGGCGCCTAGCCGTTGAGAGCGTCTATTATCTTTGTAGAGGAACAGTACGATCTTGGACTGGCCCCCTTCGCATGACCTAGAAAGATAAAGAAGTCCATGCTACTATAAGGCCTCTAAACTCCTCCCTCAGGACACTATTGCGTTGCCCATGGGGACGGGGTAGCCCCGACTTCCATAGGTCCTTGGTTCGACCTCCTAATGAGAATTGAGGTCCTTGCGCGGGCGTCTCATCCCTAAGACTTGCTTGCTCTGTATGGAGTGCCCTGTGGTTCCTCGAGTGCCAGCCGCAGAGAGGAATGCCATCAACTAGGGCGCTATTGGCCACTAACCACTCGCTCGCCAGCCGCTCGGGCTCCGCGTTTCAAGTTCGTTATCCTAACCGTCCCCTCTGCTCCACCGGGTGCCTGGCCCCTTCTTCTATCTTATCTACTGCCTTGCTCCTCGGCTCCCTACAGCTCCAGCCGCTCGCTGTAATAGCTTGCTTCTCGGGTGGCTCGCACCCCCGGGTGGTGCGGCTGAGCCAGAGTGGGCTCAACAGTCGGCCTATGTTTCCGGGCGCACGCGTAAAGGCATGATTAGTTCCACAAATCTCACTGCACTGACCATAGTAAACTCCTTCTCGTTGTACCAAAATAGAGATTTGATTTAAACGACCAGGTACAGCATCACATTTGACACCTGAGGAAGGTACAGCCCAACTATGAGGTACATCAGCAGATGTTACAATAATACGTAGATGAGTTTTGGCTGGTACAACCACTCTATTGTCCACTTCTAATAAACGTGATTGACCCAATTCTAGATCTTCTTCTGGAATCATATAACTGTCAAAAGTGAGTGACTGCTCATCGGAACTGTTATAGTCAGAATACTCATAAGTCCGATACCATTGATGTCCAATAGCTTTGATAGTAATGGCTGGATCTACTACTACCTCGTCCATTGAGTATAAGAGAGCAAATGATGGTATAGCAATGAACATCGAGATGAGACTAGGAAAGATGGTCCGAAGAATCTCGATAGTAGTTCCATGAACAATCCTTTGCGGGATTGCATTTTCTTTATAGTGGAAATGCCATAAAGCGCGAACCAAGATCCATAATACGAAAACCAAAATCAGAATGAGGAAGAAAAAGATATCGTGATGTAAGTCTATTATTCCTTGCATTATAGGTGTAGCTGCGTCTTGAGATCCTAATTGCCATGGTTCCGCTGCATCACAAGGAGAAATTGTGAGGAATAACCATTTTAGAACAATCATTTTCAAAGCAAAGGTTCCTTCATTGACTGCTCCGCTCCCCCCC.AAACAAAGAGAGACTGATTCTGACTCTCCCAATTAAGGAAGACGGAAATGACTGGTGCCGGTTGGTCCAACCAAGAAAAAAGAGATGGGAATTTTGGGCGTAAGATTCTTCTTCTTCTTACA.....ATATTTTGAGTTAGATGAACAGAGATCACTCCTCTAAGCAGCCTTCTTCTTATATACATATTATTCTGTCATGGGTTGTTAGCTGTGTTCTATCGTAGCTATCTCTGTTCAACACTTGGAGGGAGCGAGCAACGGCCTGCGAGCGATCGTAGCTACTTCCCTTAGTTTTGTTTCAAACTCTTCTCTT....TTTTCCTTTTTTCTTACTTTTCCATCTATATAAAGAGAAAGTTTTGGATTCCTGATGT.GCTCCGTAGAGCTAAA.

>B._rapa_LR1-1

CTAGGAACAGCTTCTACGACGATAGATAGGGGTCAGCTTTCTTTGGCATCTATGCCCCCTGCCC.TCCAAACAGTATGGGAGCCTTTCAGCTCGTACTGCTCACACTCCTAGATCTTCACGGCACCTCCTCCACCATAGTGTGAGCTGCTCCCAGCGGAGAAAAGCAAGGCCTACTTCGAAATTAGCTTTCAACAACGTCAACAACACCACGAAAAAAGTCAACAATGGTTGCCCACTAATCTGATCATAGGTGAAATCCAATCCCTTCGCTTCGCGCCAGGCTTTGAAACCGTAAGTCAGGCGCCTTCGGCCCTCTCCTTTCAGTCGAGTTGCTAAAGCACCTCTCGGAAGCGAGAAAGCGAGCAGCAAGCTGAAAAAAGGGAAAAGTGGTTTTATAAAGCAAAATAAGCTAAGGGGGCTGGCTAGGAATCGCAAGAATTGAGAAGGGTGGGAAAGACAGGTTCGGAAATGGCCGGATTAGCAGGAGGAAGGTCTTGAAGAGCCTGAAACAAAGAAAGGTGTACATAAAAAA.GAGGCTGGTTATGGCCTTTACTTGATAGGACTCCTTTCCCATCTATCTTGACCGGGAAGAGGGGATAAAAAACCTTGCTAACGCCCTGCCCACCCTTCTGGATCCCTCATATTTATGATTCCAGGCTTCCCGGACTCGTAATAGACGGCTAAGAACAAGAAGAGGGTCAGTAGTCTCTGCCGTTGCAGGTCCTTCTCCTTCCGCTGAGACGGCCTTCTTTTTTTGTTTGTTCACCGCGGCACGAAATCATGAAGAAGCTGGAATAACTCAGAAAGAGAGTGGCGCCTAGCCGTTGAGAGCGTCTATTATCTTTGTAGAGGAACAGTACGATCTTGGACTGGCCCCCTTCGCATGACCTAGAAAGATAAAGAAGTCCATGCTACTATAAGGCCTCTAAACTCCTCCCTCAGGACACTATTGCGTTGCCCATGGGGACGGGGTAGCCCCGACTTCCATAGGTCCTTGGTTCGACCTCCTAATGAGAATTGAGGTCCTTGCGCGGGCGTCTCATCCCTAAGACTTGCTTGCTCTGTATGGAGTGCCCTGTGGTTCCTCGAGTGCCAGCCGCAGAGAGGAATGCCATCAACTAGGGCGCTATTGGCCACTAACCACTCGCTCGCCAGCCGCTCGGGCTCCGCGTTTCAAGTTCGTTATCCTAACCGTCCCCTCTGCTCCACCGGGTGCCTGGCCCCTTCTTCTATCTTATCTACTGCCTTGCTCCTCGGCTCCCTACAGCTCCAGCCGCTCGCTGTAATAGCTTGCTTCTCGGGTGGCTCGCACCCCCGGGTGGTGCGGCTGAGCCAGAGTGGGCTCAACAGTCGGCCTATGTTTCCGGGCGCACGCGTAAAGGCATGATTAGTTCCACAAATCTCACTGCACTGACCATAGTAAACTCCTTCTCGTTGTACCAAAATAGAGATTTGATTTAAACGACCAGGTACAGCATCACATTTGACACCTGAGGAAGGTACAGCCCAACTATGAGGTACATCAGCAGATGTTACAATAATACGTAGATGAGTTTTGGCTGGTACAACCACTCTATTGTCCACTTCTAATAAACGTGATTGACCCAATTCTAGATCTTCTTCTGGAATCATATAACTGTCAAAAGTGAGTGACTGCTCATCGGAACTGTTATAGTCAGAATACTCATAAGTCCAATACCATTGATGTCCAATAGCTTTGATAGTAATGGCTGGATCTACTACTACCTCGTCCATTGAGTATAAGAGAGCAAATGATGGTATAGCAATGAACATCGAGATGAGACTAGGAAAGATGGTCCGAAGAATCTCGATAGTAGTTCCATGAACAATCCTTTGCGGGATTGCATTTTCTTTATAGTGGAAATGCCATAAAGCGCGAACCAAGATCCATAATACGAAAACCAAAATCAGAATGAGGAAGAAAAAGATATCGTGATGTAAGTCTATTATTCCTTGCATTATAGGTGTAGCTGCGTCTTGAGATCCTAATTGCCATGGTTCCGCTGCATCACAAGGAGAAATTGTGAGGAATAACCATTTTAGAACAATCATTTTCAAAGCAAAGGTTCCTTCATTGACTGCTCCGCTCCCCCCCCAAACAAAGAGAGACTGATTCTGACTCTCCCAATTAAGGAAGACGGAAATGACTGGTGCCGGTTGGTCCAACCAAGAAAAAAGAGATGGGAATTTTGGGCGTAAGATTCTTCTTCTTCTTACATTACAATATTTTGAGTTAGATGAACAGA..TCACTCCTCTAAGCAGCCGTCTTCTTATATACATATTATTCTGTCATGGGTTGTTAGCTGTGTTCTATCGTAGCTATCTCTGTTCAACACTTGGAGGGAGCGAGCAACGGCCTGCGAGCGATCGTAGCTACTTCCCTTAGTTTTGTTTCAAACTCTTCTATTACAGTACAGAGGATTAGTCCCATTTTCGTCACGATCGATCCAC.GCCCGGGCTTAGAAAGCTAGCTTACTAA........

>B._rapa_LR1-2

CTAGGAACAGCTTCTACGACGATAGATAGGGGTCAGCTTTCTTTGGCATCTATGCCCCCTGCCC.TCCAAACAGTATGGGAGCCTTTCAGCTCGTACTGCTCACACTCCTAGATCTTCACGGCACCTCCTCCACCATAGTGTGAGCTGCTCCCAGCGGAGAAAAGCAAGGCCTACTTCGAAATTAGCTTTCAACAACGTCAACAACACCACGAAAAAAGTCAACAATGGTTGCCCACTAATCTGATCATAGGTGAAATCCAATCCCTTCGCTTCGCGCCAGGCTTTGAAACCGTAAGTCAGGCGCCTTCGGCCCTCTCCTTTCAGTCGAGTTGCTAAAGCACCTCTCGGAAGCGAGAAAGCGAGCAGCAAGCTGAAAAAAGGGAAAAGTGGTTTTATAAAGCAAAATAAGCTAAGGGGGCTGGCTAGGAATCGCAAGAATTGAGAAGGGTGGGAAAGACAGGTTCGGAAATGGCCGGATTAGCAGGAGGAAGGTCTTGAAGAGCCTGAAACAAAGAAAGGTGTACATAAAAAAAGAGGCTGGTTATGGCCTTTACTTGATAGGACTCCTTTCCCATCTATCTTGACCGGGAAGAGGGGATAAAAAACCTTGCTAACGCCCTGCCCACCCTTCTGGATCCCTCATATTTATGATTCCAGGCTTCCCGGACTCGTAATAGACGGCTAAGAACAAGAAGAGGGTCAGTAGTCTCTGCCGTTGCAGGTCCTTCTCCTTCCGCTGAGACGGCCTTCTTTTTTTGTTTGTTCACCGCGGCACGAAATCATGAAGAAGCTGGAATAACTCAGAAAGAGAGTGGCGCCTAGCCGTTGAGAGCGTCTATTATCTTTGTAGAGGAACAGTACGATCTTGGACTGGCCCCCTTCGCATGACCTAGAAAGATAAAGAAGTCCATGCTACTATAAGGCCTCTAAACTCCTCCCTCAGGACACTATTGCGTTGCCCATGGGGACGGGGTAGCCCCGACTTCCATAGGTCCTTGGTTCGACCTCCTAATGAGAATTGAGGTCCTTGCGCGGGCGTCTCATCCCTAAGACTTGCTTGCTCTGTATGGAGTGCCCTGTGGTTCCTCGAGTGCCAGCCGCAGAGAGGAATGCCATCAACTAGGGCGCTATTGGCCACTAACCACTCGCTCGCCAGCCGCTCGGGCTCCGCGTTTCAAGTTCGTTATCCTAACCGTCCCCTCTGCTCCACCGGGTGCCTGGCCCCTTCTTCTATCTTATCTACTGCCTTGCTCCTCGGCTCCCTACAGCTCCAGCCGCTCGCTGTAATAGCTTGCTTCTCGGGTGGCTCGCACCCCCGGGTGGTGCGGCTGAGCCAGAGTGGGCTCAACAGTCGGCCTATGTTTCCGGGCGCACGCGTAAAGGCATGATTAGTTCCACAAATCTCACTGCACTGACCATAGTAAACTCCTTCTCGTTGTACCAAAATAGAGATTTGATTTAAACGACCAGGTACAGCATCACATTTGACACCTGAGGAAGGTACAGCCCAACTATGAGGTACATCAGCAGATGTTACAATAATACGTAGATGAGTTTTGGCTGGTACAACCACTCTATTGTCCACTTCTAATAAACGTGATTGACCCAATTCTAGATCTTCTTCTGGAATCATATAACTGTCAAAAGTGAGTGACTGCTCATCGGAACTGTTATAGTCAGAATACTCATAAGTCCAATACCATTGATGTCCAATAGCTTTGATAGTAATGGCTGGATCTACTACTACCTCGTCCATTGAGTATAAGAGAGCAAATGATGGTATAGCAATGAACATCGAGATGAGACTAGGAAAGATGGTCCGAAGAATCTCGATAGTAGTTCCATGAACAATCCTTTGCGGGATTGCATTTTCTTTATAGTGGAAATGCCATAAAGCGCGAACCAAGATCCATAATACGAAAACCAAAATCAGAATGAGGAAGAAAAAGATATCGTGATGTAAGTCTATTATTCCTTGCATTATAGGTGTAGCTGCGTCTTGAGATCCTAATTGCCATGGTTCCGCTGCATCACAAGGAGAAATTGTGAGGAATAACCATTTTAGAACAATCATTTTCAAAGCAAAGGTTCCTTCATTGACTGCTCCGCTCCCCCCCCAAACAAAGAGAGACTGATTCTGACTCTCCCAATTAAGGAAGACGGAAATGACTGGTGCCGGTTGGTCCAACCAAGAAAAAAGAGATGGGAATTTTGGGCGTAAGATTCTTCTTCTTCTTACATTACAATATTTTGAGTTAGATGAACAGA..TCACTCCTCTAAGCAGCCGTCTTCTTATATACATATTATTCTGTCATGGGTTGTTAGCTGTGTTCTATCGTAGCTATCTCTGTTCAACACTTGGAGGGAGCGAGCAACGGCCTGCGAGCGATCGTAGCTACTTCCCTTAGTTTTGTTTCAAACTCTTCTCTT....TTTTCCTTTTTTCTTACTTTTCCATCTATATAAAGAGAAAGTTTTGGATTCCTGATGT.GCTCCGTAGAGC.....

>B._juncea_LR1-1

CTAGGAACAGCTTCTACGACGATAGATAGGGGTCAGCTTTCTTTGGCATCTATGCCCCCTGCCCCTCCAAACAGTATGGGAGCCTTTCAGCTCGTACTGCTCACACTCCTAGATCTTCACGGCACCTCCTCCACCATAGTGTGAGCTGCTCCCAGCGGAGAAAAGCAAGGCCTACTTCGAAATTAGCTTTCAACAACGTCAACAACACCACGAAAAAAGTCAACAATGGTTGCCCACTAATCTGATCATAGGTGAAATCCAATCCCTTCGCTTCGCGCCAGGCTTTGAAACCGTAAGTCAGGCGCCTTCGGCCCTCTCCTTTCAGTCGAGTTGCTAAAGCACCTCTCGGAAGCGAGAAAGCGAGCAGCAAGCTGAAAAAAGGGAAAAGTGGTTTTATAAAGCAAAATAAGCTAAGGGGGCTGGCTAGGAATCGCAAGAATTGAGAAGGGTGGGAAAGACAGGTTCGGAAATGGCCGGATTAGCAGGAGGAAGGTCTTGAAGAGCCTGAAACAAAGAAAGGTGTACATAAAAAAAGAGGCTGGTTATGGCCTTTACTTGATAGGACTCCTTTCCCATCTATCTTGACCGGGAAGAGGGGATAAAAAACCTTGCTAACGCCCTGCCCACCCTTCTGGATCCCTCATATTTATGATTCCAGGCTTCCCGGACTCGTAATAGACGGCTAAGAACAAGAAGAGGGTCAGTAGTCTCTGCCGTTGCAGGTCCTTCTCCTTCCGCTGAGACGGCCTTCTTTTTTTGTTTGTTCACCGCGGCACGAAATCATGAAGAAGCTGGAATAACTCAGAAAGAGAGTGGCGCCTAGCCGTTGAGAGCGTCTATTATCTTTGTAGAGGAACAGTACGATCTTGGACTGGCCCCCTTCGCATGACCTAGAAAGATAAAGAAGTCCATGCTACTATAAGGCCTCTAAACTCCTCCCTCAGGACACTATTGCGTTGCCCATGGGGACGGGGTAGCCCCGACTTCCATAGGTCCTTGGTTCGACCTCCTAATGAGAATTGAGGTCCTTGCGCGGGCGTCTCATCCCTAAGACTTGCTTGCTCTGTATGGAGTGCCCTGTGGTTCCTCGAGTGCCAGCCGCAGAGAGGAATGCCATCAACTAGGGCGCTATTGGCCACTAACCACTCGCTCGCCAGCCGCTCGGGCTCCGCGTTTCAAGTTCGTTATCCTAACCGTCCCCTCTGCTCCACCGGGTGCCTGGCCCCTTCTTCTATCTTATCTACTGCCTTGCTCCTCGGCTCCCTACAGCTCCAGCCGCTCGCTGTAATAGCTTGCTTCTCGGGTGGCTCGCACCCCCGGGTGGTGCGGCTGAGCCAGAGTGGGCTCAACAGTCGGCCTATGTTTCCGGGCGCACGCGTAAAGGCATGATTAGTTCCACAAATCTCACTGCACTGACCATAGTAAACTCCTTCTCGTTGTACCAAAATAGAGATTTGATTTAAACGACCAGGTACAGCATCACATTTGACACCTGAGGAAGGTACAGCCCAACTATGAGGTACATCAGCAGATGTTACAATAATACGTAGATGAGTTTTGGCTGGTACAACCACTCTATTGTCCACTTCTAATAAACGTGATTGACCCAATTCTAGATCTTCTTCTGGAATCATATAACTGTCAAAAGTGAGTGACTGCTCATCGGAACTGTTATAGTCAGAATACTCATAAGTCCAATACCATTGATGTCCAATAGCTTTGATAGTAATGGCTGGATCTACTACTACCTCGTCCATTGAGTATAAGAGAGCAAATGATGGTATAGCAATGAACATCGAGATGAGACTAGGAAAGATGGTCCGAAGAATCTCGATAGTAGTTCCATGAACAATCCTTTGCGGGATTGCATTTTCTTTATAGTGGAAATGCCATAAAGCGCGAACCAAGATCCATAATACGAAAACCAAAATCAGAATGAGGAAGAAAAAGATATCGTGATGTAAGTCTATTATTCCTTGCATTATAGGTGTAGCTGCGTCTTGAGATCCTAATTGCCATGGTTCCGCTGCATCACAAGGAGAAATTGTGAGGAATAACCATTTTAGAACAATCATTTTCAAAGCAAAGGTTCCTTCATTGACTGCTCCGCTCCCCCCCCAAACAAAGAGAGACTGATTCTGACTCTCCCAATTAAGGAAGACGGAAATGACTGGTGCCGGTTGGTCCAACCAAGAAAAAAGAGATGGGAATTTTGGGCGTAAGATTCTTCTTCTTCTTACATTACAATATTTTGAGTTAGATGAACAGA..TCACTCCTCTAAGCAGCCGTCTTCTTATATACATATTATTCTGTCATGGGTTGTTAGCTGTGTTCTATCGTAGCTATCTCTGTTCAACACTTGGAGGGAGCGAGCAACGGCCTGCGAGCGATCGTAGCTACTTCCCTTAGTTTTGTTTCAAACTCTTCTATTACAGTACAGAGGATTAGTCCCATTTTCGTCACGATCGATCCAC.GCCCGGGCTTAGAAAGCTAGCTTACT..........

>B._juncea_LR1-2

CTAGGAACAGCTTCTACGACGATAGATAGGGGTCAGCTTTCTTTGGCATCTATGCCCCCTGCCC.TCCAAACAGTATGGGAGCCTTTCAGCTCGTACTGCTCACACTCCTAGATCTTCACGGCACCTCCTCCACCATAGTGTGAGCTGCTCCCAGCGGAGAAAAGCAAGGCCTACTTCGAAATTAGCTTTCAACAACGTCAACAACACCACGAAAAAAGTCAACAATGGTTGCCCACTAATCTGATCATAGGTGAAATCCAATCCCTTCGCTTCGCGCCAGGCTTTGAAACCGTAAGTCAGGCGCCTTCGGCCCTCTCCTTTCAGTCGAGTTGCTAAAGCACCTCTCGGAAGCGAGAAAGCGAGCAGCAAGCTGAAAAAAGGGAAAAGTGGTTTTATAAAGCAAAATAAGCTAAGGGGGCTGGCTAGGAATCGCAAGAATTGAGAAGGGTGGGAAAGACAGGTTCGGAAATGGCCGGATTAGCAGGAGGAAGGTCTTGAAGAGCCTGAAACAAAGAAAGGTGTACATAAAAAAAGAGGCTGGTTATGGCCTTTACTTGATAGGACTCCTTTCCCATCTATCTTGACCGGGAAGAGGGGATAAAAAACCTTGCTAACGCCCTGCCCACCCTTCTGGATCCCTCATATTTATGATTCCAGGCTTCCCGGACTCGTAATAGACGGCTAAGAACAAGAAGAGGGTCAGTAGTCTCTGCCGTTGCAGGTCCTTCTCCTTCCGCTGAGACGGCCTTCTTTTTTTGTTTGTTCACCGCGGCACGAAATCATGAAGAAGCTGGAATAACTCAGAAAGAGAGTGGCGCCTAGCCGTTGAGAGCGTCTATTATCTTTGTAGAGGAACAGTACGATCTTGGACTGGCCCCCTTCGCATGACCTAGAAAGATAAAGAAGTCCATGCTACTATAAGGCCTCTAAACTCCTCCCTCAGGACACTATTGCGTTGCCCATGGGGACGGGGTAGCCCCGACTTCCATAGGTCCTTGGTTCGACCTCCTAATGAGAATTGAGGTCCTTGCGCGGGCGTCTCATCCCTAAGACTTGCTTGCTCTGTATGGAGTGCCCTGTGGTTCCTCGAGTGCCAGCCGCAGAGAGGAATGCCATCAACTAGGGCGCTATTGGCCACTAACCACTCGCTCGCCAGCCGCTCGGGCTCCGCGTTTCAAGTTCGTTATCCTAACCGTCCCCTCTGCTCCACCGGGTGCCTGGCCCCTTCTTCTATCTTATCTACTGCCTTGCTCCTCGGCTCCCTACAGCTCCAGCCGCTCGCTGTAATAGCTTGCTTCTCGGGTGGCTCGCACCCCCGGGTGGTGCGGCTGAGCCAGAGTGGGCTCAACAGTCGGCCTATGTTTCCGGGCGCACGCGTAAAGGCATGATTAGTTCCACAAATCTCACTGCACTGACCATAGTAAACTCCTTCTCGTTGTACCAAAATAGAGATTTGATTTAAACGACCAGGTACAGCATCACATTTGACACCTGAGGAAGGTACAGCCCAACTATGAGGTACATCAGCAGATGTTACAATAATACGTAGATGAGTTTTGGCTGGTACAACCACTCTATTGTCCACTTCTAATAAACGTGATTGACCCAATTCTAGATCTTCTTCTGGAATCATATAACTGTCAAAAGTGAGTGACTGCTCATCGGAACTGTTATAGTCAGAATACTCATAAGTCCAATACCATTGATGTCCAATAGCTTTGATAGTAATGGCTGGATCTACTACTACCTCGTCCATTGAGTATAAGAGAGCAAATGATGGTATAGCAATGAACATCGAGATGAGACTAGGAAAGATGGTCCGAAGAATCTCGATAGTAGTTCCATGAACAATCCTTTGCGGGATTGCATTTTCTTTATAGTGGAAATGCCATAAAGCGCGAACCAAGATCCATAATACGAAAACCAAAATCAGAATGAGGAAGAAAAAGATATCGTGATGTAAGTCTATTATTCCTTGCATTATAGGTGTAGCTGCGTCTTGAGATCCTAATTGCCATGGTTCCGCTGCATCACAAGGAGAAATTGTGAGGAATAACCATTTTAGAACAATCATTTTCAAAGCAAAGGTTCCTTCATTGACTGCTCCGCTCCCCCCCCAAACAAAGAGAGACTGATTCTGACTCTCCCAATTAAGGAAGACGGAAATGACTGGTGCCGGTTGGTCCAACCAAGAAAAAAGAGATGGGAATTTTGGGCGTAAGATTCTTCTTCTTCTTACATTACAATATTTTGAGTTAGATGAACAGA..TCACTCCTCTAAGCAGCCGTCTTCTTATATACATATTATTCTGTCATGGGTTGTTAGCTGTGTTCTATCGTAGCTATCTCTGTTCAACACTTGGAGGGAGCGAGCAACGGCCTGCGAGCGATCGTAGCTACTTCCCTTAGTTTTGTTTCAAACTCTTCTCTT....TTTTCCTTTTTTCTTACTTTTCCATCTATATAAAGAGAAAGTTTTGGATTCCTGATGT.GCTCCGTAGAGC.....

>B_napus_pol_LR1-1

CTAGGAACAGCTTCTACGACGATAGATAGGGGTCAGCTTTCTTTGGCATCTATGCCCCCTGCCC.TCCAAACAGTATGGGAGCCTTTCAGCTCGTACTGCTCACACTCCTAGATCTTCACGGCACCTCCTCCACCATAGTGTGAGCTGCTCCCAGCGGAGAAAAGCAAGGCCTACTTCGAAATTAGCTTTCAACAACGTCAACAACACCACGAAAAAAGTCAACAATGGTTGCCCACTAATCTGATCATAGGTGAAATCCAATCCCTTCGCTTCGCGCCAGGCTTTGAAACCGTAAGTCAGGCGCCTTCGGCCCTCTCCTTTCAGTCGAGTTGCTAAAGCACCTCTCGGAAGCGAGAAAGCGAGCAGCAAGCTGAAAAAAGGGAAAAGTGGTTTTATAAAGCAAAATAAGCTAAGGGGGCTGGCTAGGAATCGCAAGAATTGAGAAGGGTGGGAAAGACAGGTTCGGAAATGGCCGGATTAGCAGGAGGAAGGTCTTGAAGAGCCTGAAACAAAGAAAGGTGTACATAAAAAAAGAGGCTGGTTATGGCCTTTACTTGATAGGACTCCTTTCCCATCTATCTTGACCGGGAAGAGGGGATAAAAAACCTTGCTAACGCCCTGCCCACCCTTCTGGATCCCTCATATTTATGATTCCAGGCTTCCCGGACTCGTAATAGACGGCTAAGAACAAGAAGAGGGTCAGTAGTCTCTGCCGTTGCAGGTCCTTCTCCTTCCGCTGAGACGGCCTTCTTTTTTTGTTTGTTCACCGCGGCACGAAATCATGAAGAAGCTGGAATAACTCAGAAAGAGAGTGGCGCCTAGCCGTTGAGAGCGTCTATTATCTTTGTAGAGGAACAGTACGATCTTGGACTGGCCCCCTTCGCATGACCTAGAAAGATAAAGAAGTCCATGCTACTATAAGGCCTCTAAACTCCTCCCTCAGGACACTATTGCGTTGCCCATGGGGACGGGGTAGCCCCGACTTCCATAGGTCCTTGGTTCGACCTCCTAATGAGAATTGAGGTCCTTGCGCGGGCGTCTCATCCCTAAGACTTGCTTGCTCTGTATGGAGTGCCCTGTGGTTCCTCGAGTGCCAGCCGCAGAGAGGAATGCCATCAACTAGGGCGCTATTGGCCACTAACCACTCGCTCGCCAGCCGCTCGGGCTCCGCGTTTCAAGTTCGTTATCCTAACCGTCCCCTCTGCTCCACCGGGTGCCTGGCCCCTTCTTCTATCTTATCTACTGCCTTGCTCCTCGGCTCCCTACAGCTCCAGCCGCTCGCTGTAATAGCTTGCTTCTCGGGTGGCTCGCACCCCCGGGTGGTGCGGCTGAGCCAGAGTGGGCTCAACAGTCGGCCTATGTTTCCGGGCGCACGCGTAAAGGCATGATTAGTTCCACAAATCTCACTGCACTGACCATAGTAAACTCCTTCTCGTTGTACCAAAATAGAGATTTGATTTAAACGACCAGGTACAGCATCACATTTGACACCTGAGGAAGGTACAGCCCAACTATGAGGTACATCAGCAGATGTTACAATAATACGTAGATGAGTTTTGGCTGGTACAACCACTCTATTGTCCACTTCTAATAAACGTGATTGACCCAATTCTAGATCTTCTTCTGGAATCATATAACTGTCAAAAGTGAGTGACTGCTCATCGGAACTGTTATAGTCAGAATACTCATAAGTCCAATACCATTGATGTCCAATAGCTTTGATAGTAATGGCTGGATCTACTACTACCTCGTCCATTGAGTATAAGAGAGCAAATGATGGTATAGCAATGAACATCGAGATGAGACTAGGAAAGATGGTCCGAAGAATCTCGATAGTAGTTCCATGAACAATCCTTTGCGGGATTGCATTTTCTTTATAGTGGAAATGCCATAAAGCGCGAACCAAGATCCATAATACGAAAACCAAAATCAGAATGAGGAAGAAAAAGATATCGTGATGTAAGTCTATTATTCCTTGCATTATAGGTGTAGCTGCGTCTTGAGATCCTAATTGCCATGGTTCCGCTGCATCACAAGGAGAAATTGTGAGGAATAACCATTTTAGAACAATCATTTTCAAAGCAAAGGTTCCTTCATTGACTGCTCCGCTCCCCCCCCAAACAAAGAGAGACTGATTCTGACTCTCCCAATTAAGGAAGACGGAAATGACTGGTGCCGGTTGGTCCAACCAAGAAAAAAGAGATGGGAATTTTGGGCGTAAGATTCTTCTTCTTCTTACATTACAATATTTTGAGTTAGATGAACAGA..TCACTCCTCTAAGCAGCCGTCTTCTTATATACATATTATTCTGTCATGGGTTGTTAGCTGTGTTCTATCGTAGCTATCTCTGTTCAACACTTGGAGGGAGCGAGCAACGGCCTGCGAGCGATCGTAGCTACTTCCCTTAGTTTTGTTTCAAACTCTTCTATTACAGTACAGAGGATTAGTCCCATTTTCGTCACGATCGATCCAC.GCCCGGGCTTAGAAAGCTAGCTTACTA.........

>B_napus_pol_LR1-2

CTAGGAACAGCTTCTACGACGATAGATAGGGGTCAGCTTTCTTTGGCATCTATGCCCCCTGCCC.TCCAAACAGTATGGGAGCCTTTCAGCTCGTACTGCTCACACTCCTAGATCTTCACGGCACCTCCTCCACCATAGTGTGAGCTGCTCCCAGCGGAGAAAAGCAAGGCCTACTTCGAAATTAGCTTTCAACAACGTCAACAACACCACGAAAAAAGTCAACAATGGTTGCCCACTAATCTGATCATAGGTGAAATCCAATCCCTTCGCTTCGCGCCAGGCTTTGAAACCGTAAGTCAGGCGCCTTCGGCCCTCTCCTTTCAGTCGAGTTGCTAAAGCACCTCTCGGAAGCGAGAAAGCGAGCAGCAAGCTGAAAAAAGGGAAAAGTGGTTTTATAAAGCAAAATAAGCTAAGGGGGCTGGCTAGGAATCGCAAGAATTGAGAAGGGTGGGAAAGACAGGTTCGGAAATGGCCGGATTAGCAGGAGGAAGGTCTTGAAGAGCCTGAAACAAAGAAAGGTGTACATAAAAAAAGAGGCTGGTTATGGCCTTTACTTGATAGGACTCCTTTCCCATCTATCTTGACCGGGAAGAGGGGATAAAAAACCTTGCTAACGCCCTGCCCACCCTTCTGGATCCCTCATATTTATGATTCCAGGCTTCCCGGACTCGTAATAGACGGCTAAGAACAAGAAGAGGGTCAGTAGTCTCTGCCGTTGCAGGTCCTTCTCCTTCCGCTGAGACGGCCTTCTTTTTTTGTTTGTTCACCGCGGCACGAAATCATGAAGAAGCTGGAATAACTCAGAAAGAGAGTGGCGCCTAGCCGTTGAGAGCGTCTATTATCTTTGTAGAGGAACAGTACGATCTTGGACTGGCCCCCTTCGCATGACCTAGAAAGATAAAGAAGTCCATGCTACTATAAGGCCTCTAAACTCCTCCCTCAGGACACTATTGCGTTGCCCATGGGGACGGGGTAGCCCCGACTTCCATAGGTCCTTGGTTCGACCTCCTAATGAGAATTGAGGTCCTTGCGCGGGCGTCTCATCCCTAAGACTTGCTTGCTCTGTATGGAGTGCCCTGTGGTTCCTCGAGTGCCAGCCGCAGAGAGGAATGCCATCAACTAGGGCGCTATTGGCCACTAACCACTCGCTCGCCAGCCGCTCGGGCTCCGCGTTTCAAGTTCGTTATCCTAACCGTCCCCTCTGCTCCACCGGGTGCCTGGCCCCTTCTTCTATCTTATCTACTGCCTTGCTCCTCGGCTCCCTACAGCTCCAGCCGCTCGCTGTAATAGCTTGCTTCTCGGGTGGCTCGCACCCCCGGGTGGTGCGGCTGAGCCAGAGTGGGCTCAACAGTCGGCCTATGTTTCCGGGCGCACGCGTAAAGGCATGATTAGTTCCACAAATCTCACTGCACTGACCATAGTAAACTCCTTCTCGTTGTACCAAAATAGAGATTTGATTTAAACGACCAGGTACAGCATCACATTTGACACCTGAGGAAGGTACAGCCCAACTATGAGGTACATCAGCAGATGTTACAATAATACGTAGATGAGTTTTGGCTGGTACAACCACTCTATTGTCCACTTCTAATAAACGTGATTGACCCAATTCTAGATCTTCTTCTGGAATCATATAACTGTCAAAAGTGAGTGACTGCTCATCGGAACTGTTATAGTCAGAATACTCATAAGTCCAATACCATTGATGTCCAATAGCTTTGATAGTAATGGCTGGATCTACTACTACCTCGTCCATTGAGTATAAGAGAGCAAATGATGGTATAGCAATGAACATCGAGATGAGACTAGGAAAGATGGTCCGAAGAATCTCGATAGTAGTTCCATGAACAATCCTTTGCGGGATTGCATTTTCTTTATAGTGGAAATGCCATAAAGCGCGAACCAAGATCCATAATACGAAAACCAAAATCAGAATGAGGAAGAAAAAGATATCGTGATGTAAGTCTATTATTCCTTGCATTATAGGTGTAGCTGCGTCTTGAGATCCTAATTGCCATGGTTCCGCTGCATCACAAGGAGAAATTGTGAGGAATAACCATTTTAGAACAATCATTTTCAAAGCAAAGGTTCCTTCATTGACTGCTCCGCTCCCCCCCCAAACAAAGAGAGACTGATTCTGACTCTCCCAATTAAGGAAGACGGAAATGACTGGTGCCGGTTGGTCCAACCAAGAAAAAAGAGATGGGAATTTTGGGCGTAAGATTCTTCTTCTTCTTACATTACAATATTTTGAGTTAGATGAACAGA..TCACTCCTCTAAGCAGCCGTCTTCTTATATACATATTATTCTGTCATGGGTTGTTAGCTGTGTTCTATCGTAGCTATCTCTGTTCAACACTTGGAGGGAGCGAGCAACGGCCTGCGAGCGATCGTAGCTACTTCCCTTAGTTTTGTTTCAAACTCTTCTCTT....TTTTCCTTTTTTCTTACTTTTCCATCTATATAAAGAGAAAGTTTTGGATTCCTGATGT.GCTCCGTAGAGC.....

>B._oleracea_f_LR1-1

CTAGGAACAGCTTCTACGACGATAGATAGGGGTCAGCTTTCTTTGGCATCTATGCCCCCTGCCC.TCCAAACAGTATGGGAGCCTTTCAGCTCGTACTGCTCACACTCCTAGATCTTCACGGCACCTCCTCCACCATAGTGTGAGCTGCTCCCAGCGGAGAAAAGCAAGGCCTACTTCGAAATTAGCTTTCAACAACGTCAACAACACCACGAAAAAAGTCAACAATGGTTGCCCACTAATCTGATCATAGGTGAAATCCAATCCCTTCGCTTCGCGCCAGGCTTTGAAACCGTAAGTCAGGCGCCTTCGGCCCTCTCCTTTCAGTCGAGTTGCTAAAGCACCTCTCGGAAGCGAGAAAGCGAGCAGCAAGCTGAAAAAAGGGAAAAGTGGTTTTATAAAGCAAAATAAGCTAAGGGGGCTGGCTAGGAATCGCAAGAATTGAGAAGGGTGGGAAAGACAGGTTCGGAAATGGCCGGATTAGCAGGAGGAAGGTCTTGAAGAGCCTGAAACAAAGAAAGGTGTACATAAAAAAAGAGGCTGGTTATGGCCTTTACTTGATAGGACTCCTTTCCCATCTATCTTGACCGGGAAGAGGGGATAAAAAACCTTGCTAACGCCCTGCCCACCCTTCTGGATCCCTCATATTTATGATTCCAGGCTTCCCGGACTCGTAATAGACGGCTAAGAACAAGAAGAGGGTCAGTAGTCTCTGCCGTTGCAGGTCCTTCTCCTTCCGCTGAGACGGCCTTCTTTTTTTGTTTGTTCACCGCGGCACGAAATCATGAAGAAGCTGGAATAACTCAGAAAGAGAGTGGCGCCTAGCCGTTGAGAGCGTCTATTATCTTTGTAGAGGAACAGTACGATCTTGGACTGGCCCCCTTCGCATGACCTAGAAAGATAAAGAAGTCCATGCTACTATAAGGCCTCTAAACTCCTCCCTCAGGACACTATTGCGTTGCCCATGGGGACGGGGTAGCCCCGACTTCCATAGGTCCTTGGTTCGACCTCCTAATGAGAATTGAGGTCCTTGCGCGGGCGTCTCATCCCTAAGACTTGCTTGCTCTGTATGGAGTGCCCTGTGGTTCCTCGAGTGCCAGCCGCAGAGAGGAATGCCATCAACTAGGGCGCTATTGGCCACTAACCACTCGCTCGCCAGCCGCTCGGGCTCCGCGTTTCAAGTTCGTTATCCTAACCGTCCCCTCTGCTCCACCGGGTGCCTGGCCCCTTCTTCTATCTTATCTACTGCCTTGCTCCTCGGCTCCCTACAGCTCCAGCCGCTCGCTGTAATAGCTTGCTTCTCGGGTGGCTCGCACCCCCGGGTGGTGCGGCTGAGCCAGAGTGGGCTCAACAGTCGGCCTATGTTTCCGGGCGCACGCGTAAAGGCATGATTAGTTCCACAAATCTCACTGCACTGACCATAGTAAACTCCTTCTCGTTGTACCAAAATAGAGATTTGATTTAAACGACCAGGTACAGCATCACATTTGACACCTGAGGAAGGTACAGCCCAACTATGAGGTACATCAGCAGATGTTACAATAATACGTAGATGAGTTTTGGCTGGTACAACCACTCTATTGTCCACTTCTAATAAACGTGATTGACCCAATTCTAGATCTTCTTCTGGAATCATATAACTGTCAAAAGTGAGTGACTGCTCATCGGAACTGTTATAGTCAGAATACTCATAAGTCCAATACCATTGATGTCCAATAGCTTTGATAGTAATGGCTGGATCTACTACTACCTCGTCCATTGAGTATAAGAGAGCAAATGATGGTATAGCAATGAACATCGAGATGAGACTAGGAAAGATGGTCCGAAGAATCTCGATAGTAGTTCCATGAACAATCCTTTGCGGGATTGCATTTTCTTTATAGTGGAAATGCCATAAAGCGCGAACCAAGATCCATAATACGAAAACCAAAATCAGAATGAGGAAGAAAAAGATATCGTGATGTAAGTCTATTATTCCTTGCATTATAGGTGTAGCTGCGTCTTGAGATCCTAATTGCCATGGTTCCGCTGCATCACAAGGAGAAATTGTGAGGAATAACCATTTTAGAACAATCATTTTCAAAGCAAAGGTTCCTTCATTGACTGCTCCGCTCCCCCCCCAAACAAAGAGAGACTGATTCTGACTCTCCCAATTAAGGAAGACGGAAATGACTGGTGCCGGTTGGTCCAACCAAGAAAAAAGAGATGGGAATTTTGGGCGTAAGATTCTTCTTCTTCTTACATTACAATATTTTGAGTTAGATGAACAGA..TCACTCCTCTAAGCAGCCGTCTTCTTATATACATATTATTCTGTCATGGGTTGTTAGCTGTGTTCTATCGTAGCTATCTCTGTTCAACACTTGGAGGGAGCGAGCAACGGCCTGCGAGCGATCGTAGCTACTTCCCTTAGTTTTGTTTCAAACTCTTCTATTACAGTACAGAGGATTAGTCCCATTTTCGTCACGATCGATCCAC.GCCCGGGCTTAGAAAGCTAGCTTACTA.........

>B._oleracea_f_LR1-2

CTAGGAACAGCTTCTACGACGATAGATAGGGGTCAGCTTTCTTTGGCATCTATGCCCCCTGCCC.TCCAAACAGTATGGGAGCCTTTCAGCTCGTACTGCTCACACTCCTAGATCTTCACGGCACCTCCTCCACCATAGTGTGAGCTGCTCCCAGCGGAGAAAAGCAAGGCCTACTTCGAAATTAGCTTTCAACAACGTCAACAACACCACGAAAAAAGTCAACAATGGTTGCCCACTAATCTGATCATAGGTGAAATCCAATCCCTTCGCTTCGCGCCAGGCTTTGAAACCGTAAGTCAGGCGCCTTCGGCCCTCTCCTTTCAGTCGAGTTGCTAAAGCACCTCTCGGAAGCGAGAAAGCGAGCAGCAAGCTGAAAAAAGGGAAAAGTGGTTTTATAAAGCAAAATAAGCTAAGGGGGCTGGCTAGGAATCGCAAGAATTGAGAAGGGTGGGAAAGACAGGTTCGGAAATGGCCGGATTAGCAGGAGGAAGGTCTTGAAGAGCCTGAAACAAAGAAAGGTGTACATAAAAAAAGAGGCTGGTTATGGCCTTTACTTGATAGGACTCCTTTCCCATCTATCTTGACCGGGAAGAGGGGATAAAAAACCTTGCTAACGCCCTGCCCACCCTTCTGGATCCCTCATATTTATGATTCCAGGCTTCCCGGACTCGTAATAGACGGCTAAGAACAAGAAGAGGGTCAGTAGTCTCTGCCGTTGCAGGTCCTTCTCCTTCCGCTGAGACGGCCTTCTTTTTTTGTTTGTTCACCGCGGCACGAAATCATGAAGAAGCTGGAATAACTCAGAAAGAGAGTGGCGCCTAGCCGTTGAGAGCGTCTATTATCTTTGTAGAGGAACAGTACGATCTTGGACTGGCCCCCTTCGCATGACCTAGAAAGATAAAGAAGTCCATGCTACTATAAGGCCTCTAAACTCCTCCCTCAGGACACTATTGCGTTGCCCATGGGGACGGGGTAGCCCCGACTTCCATAGGTCCTTGGTTCGACCTCCTAATGAGAATTGAGGTCCTTGCGCGGGCGTCTCATCCCTAAGACTTGCTTGCTCTGTATGGAGTGCCCTGTGGTTCCTCGAGTGCCAGCCGCAGAGAGGAATGCCATCAACTAGGGCGCTATTGGCCACTAACCACTCGCTCGCCAGCCGCTCGGGCTCCGCGTTTCAAGTTCGTTATCCTAACCGTCCCCTCTGCTCCACCGGGTGCCTGGCCCCTTCTTCTATCTTATCTACTGCCTTGCTCCTCGGCTCCCTACAGCTCCAGCCGCTCGCTGTAATAGCTTGCTTCTCGGGTGGCTCGCACCCCCGGGTGGTGCGGCTGAGCCAGAGTGGGCTCAACAGTCGGCCTATGTTTCCGGGCGCACGCGTAAAGGCATGATTAGTTCCACAAATCTCACTGCACTGACCATAGTAAACTCCTTCTCGTTGTACCAAAATAGAGATTTGATTTAAACGACCAGGTACAGCATCACATTTGACACCTGAGGAAGGTACAGCCCAACTATGAGGTACATCAGCAGATGTTACAATAATACGTAGATGAGTTTTGGCTGGTACAACCACTCTATTGTCCACTTCTAATAAACGTGATTGACCCAATTCTAGATCTTCTTCTGGAATCATATAACTGTCAAAAGTGAGTGACTGCTCATCGGAACTGTTATAGTCAGAATACTCATAAGTCCAATACCATTGATGTCCAATAGCTTTGATAGTAATGGCTGGATCTACTACTACCTCGTCCATTGAGTATAAGAGAGCAAATGATGGTATAGCAATGAACATCGAGATGAGACTAGGAAAGATGGTCCGAAGAATCTCGATAGTAGTTCCATGAACAATCCTTTGCGGGATTGCATTTTCTTTATAGTGGAAATGCCATAAAGCGCGAACCAAGATCCATAATACGAAAACCAAAATCAGAATGAGGAAGAAAAAGATATCGTGATGTAAGTCTATTATTCCTTGCATTATAGGTGTAGCTGCGTCTTGAGATCCTAATTGCCATGGTTCCGCTGCATCACAAGGAGAAATTGTGAGGAATAACCATTTTAGAACAATCATTTTCAAAGCAAAGGTTCCTTCATTGACTGCTCCGCTCCCCCCCCAAACAAAGAGAGACTGATTCTGACTCTCCCAATTAAGGAAGACGGAAATGACTGGTGCCGGTTGGTCCAACCAAGAAAAAAGAGATGGGAATTTTGGGCGTAAGATTCTTCTTCTTCTTACATTACAATATTTTGAGTTAGATGAACAGA..TCACTCCTCTAAGCAGCCGTCTTCTTATATACATATTATTCTGTCATGGGTTGTTAGCTGTGTTCTATCGTAGCTATCTCTGTTCAACACTTGGAGGGAGCGAGCAACGGCCTGCGAGCGATCGTAGCTACTTCCCTTAGTTTTGTTTCAAACTCTTCTATT....TTTTCCTTTTTTCTTACTTTTCCATCTATATAAAGAGAAAGTTTTGGATTCCTGATGT.GCTCCGTAGAGC.....
